# 1 Regulation of effector gene expression as concerted waves in *Leptosphaeria* 2 *maculans*: a two-players game

3 C. Clairet<sup>1</sup>, E.J. Gay<sup>1</sup>, A. Porquier<sup>1</sup>, F. Blaise<sup>1</sup>, C.L. Marais<sup>1</sup>, M.-H. Balesdent<sup>1</sup>, T. Rouxel<sup>1</sup>, J.L. Soyer<sup>1\*\*</sup> and  
4 I. Fudal<sup>1\*\*</sup>

5 <sup>1</sup>Université Paris-Saclay, INRAE, UR BIOGER, 78850, Thiverval-Grignon, France

6 \*To whom correspondence should be addressed.

7 <sup>†</sup>Both authors contributed equally to this work.

8 E-mail: [jessica.soyer@inrae.fr](mailto:jessica.soyer@inrae.fr); [isabelle.fudal@inrae.fr](mailto:isabelle.fudal@inrae.fr)

## 9 10 ABSTRACT

11 During infection, plant pathogenic fungi secrete a set of molecules collectively known as effectors,  
12 involved in overcoming the host immune system and in disease establishment. Effector genes are  
13 concertedly expressed as waves all along plant pathogenic fungi lifecycle. However, little is known  
14 about how coordinated expression of effector genes is regulated. Since many effector genes are  
15 located in repeat-rich regions, the role of chromatin remodeling in the regulation of effector  
16 expression was recently investigated. In *Leptosphaeria maculans*, causing stem canker of oilseed rape,  
17 we established that the repressive histone modification H3K9me3 (trimethylation of Lysine 9 of  
18 Histone H3), deposited by the histone methyltransferase KMT1, was involved in the regulation of  
19 expression of genes highly expressed during infection, including effectors. Nevertheless, inactivation  
20 of *KMT1* did not induce expression of these genes at the same level as observed during infection of  
21 oilseed rape, suggesting that a second regulator, such as a transcription factor (TF), might be involved.  
22 Pf2, a TF belonging to the Zn2Cys6 fungal specific TF family, was described in several Dothideomycete  
23 species as essential for pathogenicity and effector gene expression. We identified the orthologue of  
24 Pf2 in *L. maculans*, LmPf2, and investigated the role of LmPf2 together with KMT1, by inactivating and  
25 over-expressing *LmPf2* in a wild type (WT) strain and a  $\Delta kmt1$  mutant. Functional analyses of the  
26 corresponding transformants highlighted an essential role of LmPf2 in the establishment of  
27 pathogenesis. Transcriptomic analyses during axenic growth showed that LmPf2 is involved in the  
28 control of effector gene expression. We observed an enhanced effect of the over-expression of *LmPf2*  
29 on effector gene expression in a  $\Delta kmt1$  background, suggesting an antagonist role between KMT1 and  
30 LmPf2.

31 Keywords: *Leptosphaeria maculans*, effectors, histone modifications, transcription factor,  
32 pathogenicity, RNA-seq  
33

## 34 INTRODUCTION

35 During infection, plant pathogenic fungi secrete a set of molecules, collectively known as  
36 effectors, involved in overcoming the host immune defense system, nutrient uptake and, eventually,  
37 symptom development (Lo Presti *et al.*, 2015). Effectors correspond to secondary metabolites, siRNA,  
38 and small secreted proteins (SSP); the latter being often cysteine-rich, with rare homology to other  
39 known proteins in the databases (Weiberg *et al.*, 2013; Lo Presti *et al.*, 2015; Collemare *et al.*, 2019).  
40 Effector genes of filamentous plant pathogens are often located in transposable elements (TEs)-rich  
41 regions of the genomes, such as dispensable chromosomes or telomeres (Sánchez-Vallet *et al.*, 2018).  
42 Transcriptomic data generated during different stages of plant infection highlighted concerted waves  
43 of effector gene expression over the course of infection, according to the infection structure, to the  
44 host-plant infected or to the species or strain studied (e.g. Sanchez-Vallet *et al.*, 2018; Haueisen *et al.*,  
45 2019; Gay *et al.*, 2021). Little is known about how coordinated expression of effector genes is  
46 regulated. Based on observation that many effector genes are located in TE-rich regions, and up-  
47 regulated during host penetration/infection, the role of chromatin remodeling in the regulation of  
48 effector expression was recently investigated. Analyses in plant-interacting fungi have shed light on  
49 two histone methyltransferases, KMT1 and KMT6, as involved in the regulation of effector gene  
50 expression (Chujo & Scott 2014; Soyer *et al.*, 2014; Soyer *et al.*, 2019; Meile *et al.* 2020; Zhang *et al.*,  
51 2021).

52 *Leptosphaeria maculans*, the causal agent of stem canker of oilseed rape (*Brassica napus*),  
53 displays a complex life cycle with alternating stages of saprophytism, asymptomatic growth and  
54 necrotrophy (Rouxel and Balesdent, 2005). During infection of oilseed rape, several waves of genes are  
55 expressed, including predicted effector genes (Gay *et al.*, 2021). Of particular interest, a specific set of  
56 effector genes is expressed during the asymptomatic stages occurring on leaves, petioles and stems,  
57 including the 11 avirulence genes (*AvrLm*) identified so far, these genes all being located in TE-rich  
58 regions (*AvrLm1*, *AvrLm2*, *AvrLm3*, *AvrLm4-7*, *AvrLm5-9*, *AvrLm6*, *AvrLm10A*, *AvrLm10B*, *AvrLm11*,  
59 *AvrLm14*, *AvrLmS-Lep2*; Gout *et al.*, 2006; Fudal *et al.*, 2007; Parlange *et al.*, 2009; Balesdent *et al.*,  
60 2013; van de Wouw *et al.*, 2014; Plissonneau *et al.*, 2016; Ghanbarnia *et al.*, 2015, 2018; Petit-  
61 Houdenot *et al.*, 2019; Neik *et al.*, 2020; Degrave *et al.*, 2021). The genome of *L. maculans* displays a  
62 bipartite structure with gene-rich regions and TE-rich regions, the latter representing one third of the  
63 genome (Rouxel *et al.*, 2011). In a recent study, we generated a map of the distribution of three histone  
64 modifications, either associated with euchromatin and gene expression (H3K4me2, dimethylation of

65 Lysine 4 of histone H3) or heterochromatin resulting in gene silencing (H3K9me3 and H3K27me3,  
66 trimethylation of Lysine 9 and Lysine 27 of Histone H3) during axenic growth (Soyer *et al.*, 2021). We  
67 highlighted an enrichment of effector genes in domains associated with either H3K9me3 or H3K27me3.  
68 Integrative analysis of ChIP-seq data *in vitro* with transcriptomic analyses performed throughout the  
69 life cycle of *L. maculans* pinpointed that *L. maculans* genes over-expressed at any stage of *B. napus*  
70 infection are enriched in heterochromatin domains *in vitro* (Gay *et al.*, 2021). In a previous study,  
71 silencing of *KMT1* had led to an over-expression of more than 30% of the genes located in TE-rich  
72 environments normally silenced in axenic culture in the WT strain, specifically effector genes (Soyer *et*  
73 *al.*, 2014). ChIP-qPCR analyses showed that over-expression of at least two effector genes was  
74 associated with a decrease of the repressive histone modification H3K9me3 in the genomic  
75 environment of these genes (Soyer *et al.*, 2014). Altogether, these analyses revealed that chromatin  
76 structure, via the dynamic of chromatin remodeling, was an important regulatory layer of effector  
77 genes up-regulated during host infection and located in TE-rich regions. Nevertheless, at least in *L.*  
78 *maculans*, inactivation of *KMT1*, while inducing expression of effector genes *in vitro*, did not induce  
79 expression of these genes at the same level as observed during infection of oilseed rape, suggesting  
80 that a second regulator, such as a transcription factor (TF), might be involved. Hence, Soyer *et al.* (2015)  
81 proposed a model of dual control of effector gene expression: chromatin condensation repressed  
82 effector gene expression *in vitro*; after chromatin loosening upon infection, one or several TFs could  
83 bind effector gene promoters resulting in their concerted expression. Synergic involvement of  
84 chromatin modifications and TF(s) in fungal effector gene regulation remains poorly understood and  
85 promising field of investigation.

86 In filamentous plant pathogens, only a few TFs influencing effector gene expression have been  
87 identified so far (see for review Tan and Oliver, 2017). Among them, AbPf2, a Zn2Cys6 TF, was first  
88 described in *Alternaria brassicicola*, in which it regulates, directly or indirectly, expression of 33 genes  
89 encoding secreted proteins including eight putative effectors (Cho *et al.*, 2013). In *Parastagonospora*  
90 *nodorum*, PnPf2 positively regulates two necrotrophic effector genes, *SnToxA* and *SnTox3*, and the  
91 orthologue of *SnToxA*, *ToxA*, is regulated by PtrPf2 in *Pyrenophora tritici-repentis* (Rybak *et al.*, 2017).  
92 In this species, a recent transcriptomic analysis comparing the WT and the *PnPf2* mutant during axenic  
93 culture and infection of wheat revealed an involvement of *PnPf2* in the regulation of twelve effector-  
94 encoding genes and of genes associated with plant cell wall degradation and nutrient assimilation  
95 (Jones *et al.*, 2019).

96 Here, we identified the homologue of Pf2 in *L. maculans* and investigated its involvement in  
97 the regulation of effector gene expression following removal of H3K9me3. We hypothesized that  
98 removal of H3K9me3 in the genomic environment of effector genes was a pre-requisite for induction  
99 of their expression through the action of one, or several, TFs during infection. We inactivated *LmPf2*

100 via CRISPR-Cas9 and over-expressed *LmPf2* in two different genetic backgrounds: a wild type strain  
101 and a strain in which *KMT1* was inactivated. We characterized the corresponding transformants for  
102 their growth, sporulation and pathogenicity. We performed a RNA-seq analysis in order to decipher  
103 the involvement of *LmPf2* and *KMT1* in gene regulation. We found out that *KMT1* and *LmPf2* are acting  
104 antagonistically to regulate expression of genes expressed during infection of oilseed rape, specifically  
105 *AvrLm* genes as well as other genes (including putative effectors) concertedly expressed during  
106 infection.

107

## 108 **MATERIALS AND METHODS**

### 109 **Fungal culture**

110 The reference isolates JN3 (v23.1.3; Rouxel *et al.*, 2011) and JN2 (v23.1.2; Balesdent *et al.*,  
111 2011), corresponding to two sister progenies of opposite mating types, were used as hosts for genetic  
112 transformations (Balesdent *et al.*, 2001). We also used a JN2 strain constitutively expressing *eGFP*  
113 (Sâsêk *et al.*, 2012) which was crossed with our mutants in order to follow the colonization of oilseed  
114 rape by the mutants. Fungal cultures and conidia production were performed as previously described  
115 (Ansan-Melayah *et al.*, 1995). For DNA/RNA extractions, mycelium was grown on V8-juice agar medium  
116 at 25°C in the dark for seven days and then plugs were transferred into 150 ml of static Fries liquid  
117 medium in 500 ml Roux flasks. Tissues were harvested after growing for seven days at 25°C.

### 118 **Pathogenicity and growth assays**

119 Pathogenicity assays were performed on cotyledons of 10-day-old plantlets of *B. napus*, ES-  
120 Astrid. Cotyledons were inoculated with pycnidiospore suspensions as described previously (Gall *et al.*,  
121 1995). Plants were incubated in a growth chamber at 19/24°C (night/day) with a 16h photoperiod and  
122 90% humidity. Symptoms were scored on 10-12 plants, with two biological replicates, 13 days post  
123 inoculation (dpi), using the IMASCORE rating scale comprising six infection classes (IC), where IC1 to  
124 IC3 correspond to various levels of resistance of the plant and IC4 to IC6 to susceptibility (Balesdent *et al.*  
125 *et al.*, 2001). Growth assays were performed by deposition of a 5 mm plug at the center of 90 mm Petri  
126 dishes (containing 20 ml of V8-juice agar medium or MMII medium). Radial growth was measured at  
127 nine days after incubation in a growth chamber (25°C) on four biological replicates and statistical  
128 analyses were performed using Kruskal-Wallis test (Guo *et al.*, 2013).

### 129 **Vector construction and fungal transformation**

130 Vectors pLAU2 and pLAU53 conferring respectively hygromycin and geneticin resistance were  
131 used to perform CRISPR-Cas9 gene inactivation, as described by Idnurm *et al.* (2017). DNA fragments

132 coding for guide RNA (gRNA) which target genes of interest were designed using the CRISPOR  
133 prediction tool and *L. maculans* JN3 strain as reference genome (<http://crispor.tefor.net/>; **Table S1**;  
134 Dutreux *et al.*, 2018). The gRNA were chosen not to match on any other genes. The DNA fragment  
135 coding for gRNA was amplified using primers MAI0309 and MAI0310 and then inserted into the *Xho*I  
136 site of plasmid pLAU53 using Gibson assembly (Silayeva and Barnes, 2018). Hence, plasmids Plau53-  
137 KMT1 and Plau53-LmPf2 were generated to inactivate *KMT1* and *LmPf2*.

138 Over-expression plasmids were obtained using the pBht2 vector conferring resistance to  
139 hygromycin (Mullins *et al.*, 2001). *EF1 $\alpha$*  promoter was amplified using EF1aProSac1F and EF1aProKpnIR  
140 primers and genomic DNA of the WT isolate as template, and then inserted into *Kpn*I-*Sac*I digested  
141 pBht2 to obtain the pBht2-prom*EF1 $\alpha$*  vector. The *LmPf2* gene and its terminator were then amplified  
142 using overex\_*LmPf2*\_Gibs\_F and overex\_*LmPf2*\_Gibs\_R primers and inserted in 3' of the *EF1 $\alpha$*   
143 promoter in the *Hind*III digested pBht2-prom*EF1 $\alpha$*  vector using Gibson assembly to obtain the plasmid  
144 pBht2-overex*LmPf2* (**Table S1**).

145 The constructs were introduced into the *Agrobacterium tumefaciens* strain C58-pGV2260 by  
146 electroporation (1.5 kV, 200  $\Omega$  and 25 mF). *Agrobacterium tumefaciens* mediated transformation  
147 (ATMT) of *L. maculans* was performed as previously described (Gout *et al.*, 2006). Transformants were  
148 plated on minimal medium complemented with geneticin (50 mg/l) for pLAU53-gRNA or hygromycin  
149 (50 mg/l) for pBht2-overex*LmPf2* and pLAU2-Cas9 and cefotaxime (250 mg/l). For the CRISPR-Cas9  
150 gene inactivation, construct containing *Cas9* (pLAU2-Cas9) was first introduced into the WT strain,  
151 transformants were selected for hygromycin resistance and this strain was subsequently transformed  
152 with pLAU53-gRNA directed against *KMT1* or *LmPf2*. Transformants were selected for geneticin,  
153 hygromycin and cefotaxime resistance. Mutations in the targeted genes were checked in the  
154 transformants by PCR amplifying with specific primers (**Table S1**) and sequencing. For the *LmPf2* over-  
155 expression, pBht2-overex*LmPf2* was introduced into the WT strain and the  $\Delta kmt1$  mutant. Insertion of  
156 the overex*LmPf2* construction was checked in transformants by PCR amplification (**Table S1**).

## 157 Fungal crosses

158 Purifications in order to eliminate *Cas9* gene and gRNA-encoding gene from the CRISPR-Cas9  
159 mutants were performed by crossing mutants with a WT strain of opposite mating type (expressing or  
160 not *GFP*; **Table S2**). Crosses were performed as described by Balesdent *et al.* (2002). Progeny was  
161 harvested and plated on V8-juice agar medium. Mycelium was collected and DNA extracted. PCR and  
162 sequencing were performed with primers check\_CRISPR\_*LmPf2* or *\_KMT1* to select progeny with the  
163 targeted CRISPR-Cas9 mutation but without *Cas9* and gRNA-encoding gene.

## 164 DNA and RNA manipulation

165 Genomic DNA was extracted from conidia or from mycelium grown in Fries liquid culture with  
166 the DNAeasy 96 plant Kit (Qiagen S.A., Courtaboeuf, France). PCR amplifications were performed as  
167 previously described (Fudal *et al.*, 2007). To identify mutation arising in the sequence of the gene  
168 targeted by the CRISPR-Cas9 strategy, sequencing was performed by Eurofins Genomics (Anzinger,  
169 Ebersberg, Germany; **Table S1**). Total RNA was extracted from mycelium grown for one week in Fries  
170 liquid medium, and from cotyledons of oilseed rape infected by *L. maculans* seven dpi as previously  
171 described (Fudal *et al.*, 2007).

## 172 **Quantitative RT-PCR**

173 Quantitative RT-PCR (qRT-PCR) were performed using a model CFX96 Real Time System  
174 (BIORAD; Hercules, CA, USA) and Absolute SYBR Green ROX dUTP Mix (ABgene, Courtaboeuf, France)  
175 as previously described (Fudal *et al.*, 2007). For each condition tested, two different RNA extractions  
176 from two different biological samples and two reverse transcriptions for each biological replicate were  
177 performed. Primers used for qRT-PCR are described in **Table S1**. Ct values were analyzed as described  
178 by Muller *et al.* (2002) or using the  $2^{-\Delta\Delta Ct}$  method (Livak and Schmittgen, 2001).  *$\beta$ -tubulin* was used as  
179 a constitutively expressed reference gene.

## 180 **Confocal microscopy and binocular observation**

181 Cotyledons of oilseed rape infected by strains expressing *GFP* were observed at two different  
182 time points (5 and 7 dpi) using a DM5500B Leica TCS SPE laser scanning confocal microscope and a 20x  
183 HCX Fluotar Leica objective lens. GFP was excited at 488 nm and emission was captured with a 505–  
184 530 nm broad-pass filter. The detector gain was set-up between 700 and 900. Calibrations of gain  
185 settings were performed with multiple control leaves and with a range of background fluorescence. All  
186 images represent at least four scans. Infected cotyledons were also observed at 8 and 13 dpi using a  
187 Leica MZ16F fluorescent binocular coupled with a Leica DFC300FX camera.

## 188 **Western Blot**

189 Total proteins were extracted from 10-100 mg lyophilized mycelium. Mycelium was ground  
190 using beads and Mixer Mill MM 400 (Retsch, Éragny, France). Total proteins were extracted, mixed  
191 with leammli buffer 4x (Biorad, Hercules, USA) and migrated on a polyacrylamide gel as described by  
192 Petit-Houdenot *et al.* (2019). Proteins were transferred on a PVDF membrane according to the  
193 manufacturer's protocol (Trans-Blot® Turbo™ Rapid Transfer System, BIORAD, Les-Ulis, France) using  
194 a small protein transfer program. The PVDF membrane was incubated in TBS 1X containing 5% powder  
195 milk, 0.05% tween 20 for one hour to saturate membrane. The membrane was then incubated at 4°C  
196 over-night in TBS 1% containing 0.05% Tween 20, milk 1% and an anti-H3K9me3 antibody (1:5000;

197 39062 ActiveMotif, La Hulpe, Belgium Germany). PVDF membrane was washed as described by Petit-  
198 Houdenot *et al.* (2019) and was then incubated in TBS 1X + 0.05% Tween 20 + milk 1% + anti-Rabbit  
199 IgG II<sup>R</sup> (goat anti-rabbit, Santa Cruz Biotechnology, Heidelberg, Allemagne) and washed as previously.  
200 Finally, membrane was incubated 1 min in 1 ml enzyme solution (Clarity™ Western ECL, BIORAD, Les-  
201 Ulis, France) and 1 ml Luminol/enhancer solution (Clarity™ Western ECL, BIORAD, Les-Ulis, France) and  
202 observed using ChemiDoc (ChemiDoc™ Imaging Systems, BIORAD, Les-Ulis, France).

### 203 **Gene annotation and domain prediction**

204 The *Pf2* orthologue of *L. maculans* had been previously identified by Rybak *et al.* (2017). As it  
205 had been identified on a previous version of the *L. maculans* genome, we performed a new search,  
206 using the protein sequence of *Pf2* from *P. nodorum* and the NCBI BLASTP program (Altschul *et al.*,  
207 1990). Functional domains were identified using Pfam (Finn *et al.*, 2014; <https://pfam.xfam.org/>).  
208 Alignments were performed with COBALT (Papadopoulos and Agarwala, 2007).

### 209 **RNA-seq and statistical analysis**

210 Eight different transformants (i.e., two mutants inactivated for *KMT1* or *LmPf2* and two  
211 transformants in which *LmPf2* was over-expressed in a WT background (WT\_0*Pf2*) or a  $\Delta kmt1$   
212 background ( $\Delta kmt1$ \_0*Pf2*, **Table S3**) were grown in static Fries liquid medium during 7 days and  
213 harvested for RNA extraction. Two RNA extractions corresponding to two biological replicates were  
214 performed for each transformant. About 150 mg of mycelium was used per extraction. Libraries were  
215 prepared from all biological replicates, individually, according to the Illumina TruSeq protocol (Illumina,  
216 San Diego, CA, USA). Libraries including polyA enrichment were performed and sequenced using 150  
217 pb paired-end strategy on an HiSeq2000 Illumina sequencer at the Genewiz sequencing facility (Leipzig,  
218 Germany) with an input of 2  $\mu$ g total RNA. Quality of the reads was checked and improved using  
219 Trimmomatic (Bolger *et al.*, 2014). The resulting reads were treated to remove adaptors and reads  
220 below 30 bp and filtered reads were mapped against the *L. maculans* genome (Dutreux *et al.*, 2018)  
221 using STAR (Dobin *et al.*, 2013) with default parameters. Read alignments were stored in SAM format,  
222 and indexing, sorting, and conversion to BAM format were performed using SAMtools v0.1.19 (Li *et*  
223 *al.*, 2009). Genes with a number of reads > 15 in at least one condition were kept for statistical analysis.  
224 Differential expression analyses were made using R, version 3.0.2 ([www.r-project.org](http://www.r-project.org)) and the package  
225 EdgeR (Robinson *et al.*, 2010). Genes with a log<sub>2</sub> Fold Change  $\leq -1.5$  or  $\geq 1.5$  and an associated False  
226 Discovery Rate  $\leq 0.05$  were considered as differentially expressed (McCarthy *et al.*, 2012).

### 227 **Gene Ontology enrichment analysis**

228 Gene Ontology (GO) annotations of *L. maculans* genes were retrieved from Dutreux *et al.*  
229 (2018). Gene ontology term enrichment analysis of the differentially expressed genes (DEG) in our  
230 transformants was performed with the plug-in Biological networks Gene ontology (BinGo; v3.0.3) of  
231 the cytoscape software (Shannon *et al.*, 2003). List of genes submitted to BINGO were considered as  
232 significantly enriched for a given GO term with an associated False Discovery Rate  $\leq 0.01$  for the  
233 biological processes. All statistical analyses were done in R, version 3.0.2 ([www.r-project.org](http://www.r-project.org)).

#### 234 **RNA-seq and ChIP-seq datasets**

235 To investigate expression of avirulence genes, *KMT1* and *LmPf2*, and *in planta* expression of  
236 the DEG in the transformants generated in this study, we used previously generated *in vitro* and *in*  
237 *planta* RNA-seq data (Gay *et al.*, 2021). Infection of oilseed rape had been performed using a WT strain.  
238 We used RNA-seq data from i) cotyledons of cultivar Darmor-*bzh* sampled 2, 5, 7, 9, 12 and 15 dpi  
239 (corresponding to EBI accession numbers SAMEA6086549, SAMEA104153286 and SAMEA104153287);  
240 ii) petioles of cultivar Darmor-*bzh* sampled 7 and 14 dpi (EBI accession numbers SAMEA104153278,  
241 ERS4810043, ERS4810044, ERS4810045); iii) stems of cultivar Bristol sampled 14 and 28 dpi (EBI  
242 accession numbers SAMEA104153293, ERS4810064, ERS4810065, ERS4810066, ERS4810067,  
243 ERS4810068) and iv) axenic growth of a WT strain on V8-medium (EBI accession numbers ERS4810062  
244 and ERS4810063). To analyze location of the DEG in the transformants generated in this study in  
245 domains associated either with euchromatin or heterochromatin, we used previously generated  
246 genome-wide chromatin map (Soyer *et al.*, 2021), available under the GEO accession number  
247 GSE150127. We assessed the significant enrichment of the DEG in H3K4me2-, H3K9me3- or  
248 H3K27me3-domains as described in Soyer *et al.* (2021). Enrichment was considered significant with a  
249 *P value*  $< 0.05$ ; Chi<sup>2</sup> tests were done using R, version 3.0.2 ([www.r-project.org](http://www.r-project.org)).

250

## 251 **RESULTS**

### 252 **Identification of a *Pf2* orthologue and analysis of *KMT1* and *LmPf2* expression in *Leptosphaeria*** 253 ***maculans***

254 In order to analyze involvement of *Pf2* in the regulation of *L. maculans* gene expression, we  
255 first identified the *Pf2* orthologue in *L. maculans*. Phylogenetic analysis showed that the closest  
256 orthologue of *Pf2* of *P. nodorum* was found in *L. maculans* (Genbank Accession XP\_003838593.1). In  
257 the recent *L. maculans* genome reannotation, this Genbank Accession corresponded to gene ID  
258 Lmb\_jn3\_06039, located on SuperContig 6 (Dutreux *et al.*, 2018). A bidirectional Best Hit with BLASTp  
259 confirmed orthology between *PnPf2* and Lmb\_jn3\_06039 (**Figure 1**). Lmb\_jn3\_06039 (hereinafter



260 referred to as *LmPf2*) encodes a 658 amino acids protein sharing 67% identity with PnPf2 with a  
 261 Zn2Cys6-type DNA-binding domain (IPR001138; **Figure 1**).

262 In a previous analysis, we identified the gene encoding *KMT1* in *L. maculans* (gene ID  
 263 Lmb\_jn3\_09141; Soyer *et al.*, 2014; Dutreux *et al.*, 2018). We investigated the expression profile of  
 264 *LmPf2* and *KMT1* during axenic growth and at different stages of oilseed rape infection in controlled

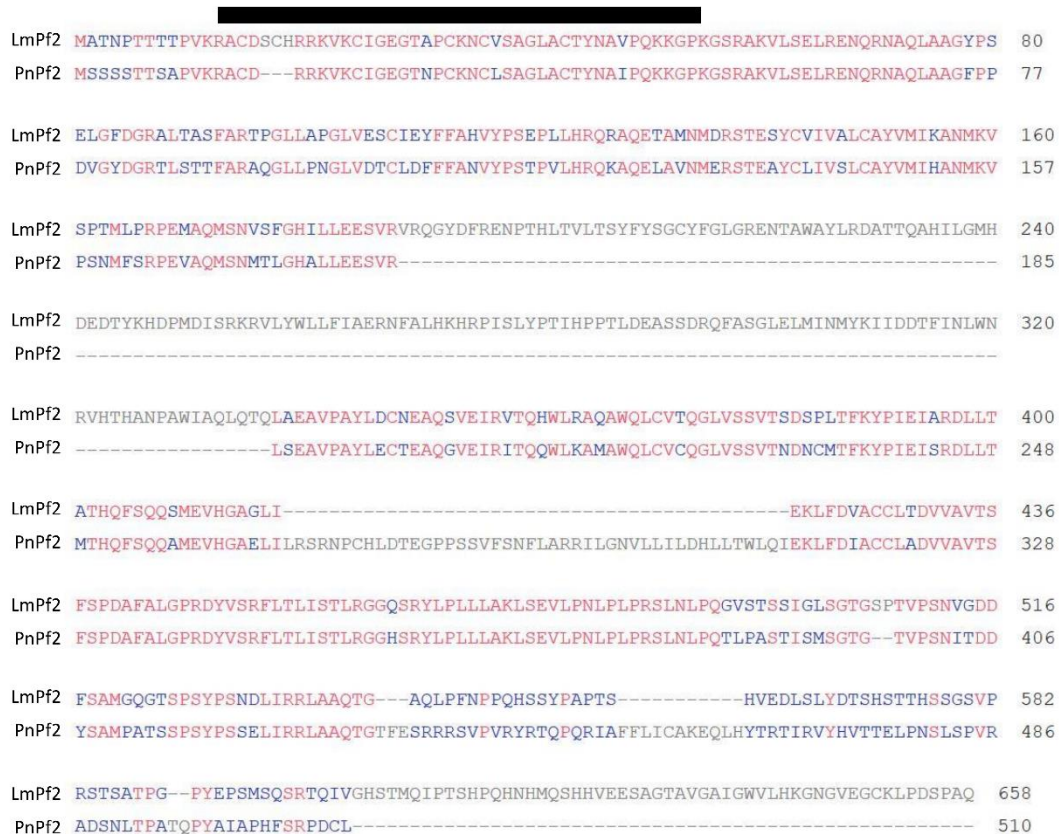

**Figure 1: Identification of the PnPf2 orthologue in *Leptosphaeria maculans*.** Alignment between *LmPf2* from *Leptosphaeria maculans* and *PnPf2* from *Parastagonospora nodorum* was performed using COBALT (Papadopoulos and Agarwala, 2007). The black bar corresponds to the Zn2Cys6-type DNA binding domain identified using Pfam (Finn *et al.*, 2014; <https://pfam.xfam.org/>). *LmPf2* and *PnPf2* share 67% identity.

265 conditions and compared their expression profiles to that of the avirulence genes of *L. maculans*  
 266 (**Figure 2**). As previously described, expression of *L. maculans* avirulence genes was repressed during  
 267 axenic growth. During cotyledon infection, their expression increased strongly during the  
 268 asymptomatic stage (between two and nine dpi), culminating at seven dpi and then, expression slowly  
 269 decreased with concomitant appearance of necrotic symptoms (between 12 and 15 dpi; **Figure 2**).  
 270 Likewise, *LmPf2* was not expressed during axenic growth while its expression was high at 2 dpi, peaked  
 271 at 7 dpi and decreased until 15 dpi. *KMT1* was inversely expressed with a high expression during axenic  
 272 growth, no expression during early infection (between two and nine dpi), and was up-regulated at 12  
 273 dpi when avirulence gene expression decreased. In contrast, during petiole and stem infection,

274 avirulence genes and *LmPf2* were highly expressed during the asymptomatic growth in petioles (7 dpi)  
275 and in stems (14 and 28 dpi), while at these stages, *KMT1* was not expressed. To summarize, *LmPf2*  
276 showed an expression profile similar to that of the *L. maculans* avirulence genes, with an earlier  
277 induction of its expression compared to avirulence genes, while expression of *KMT1* was high during  
278 axenic growth and at late stages of cotyledon infection, when expression of avirulence genes is low  
279 **(Figure 2)**.

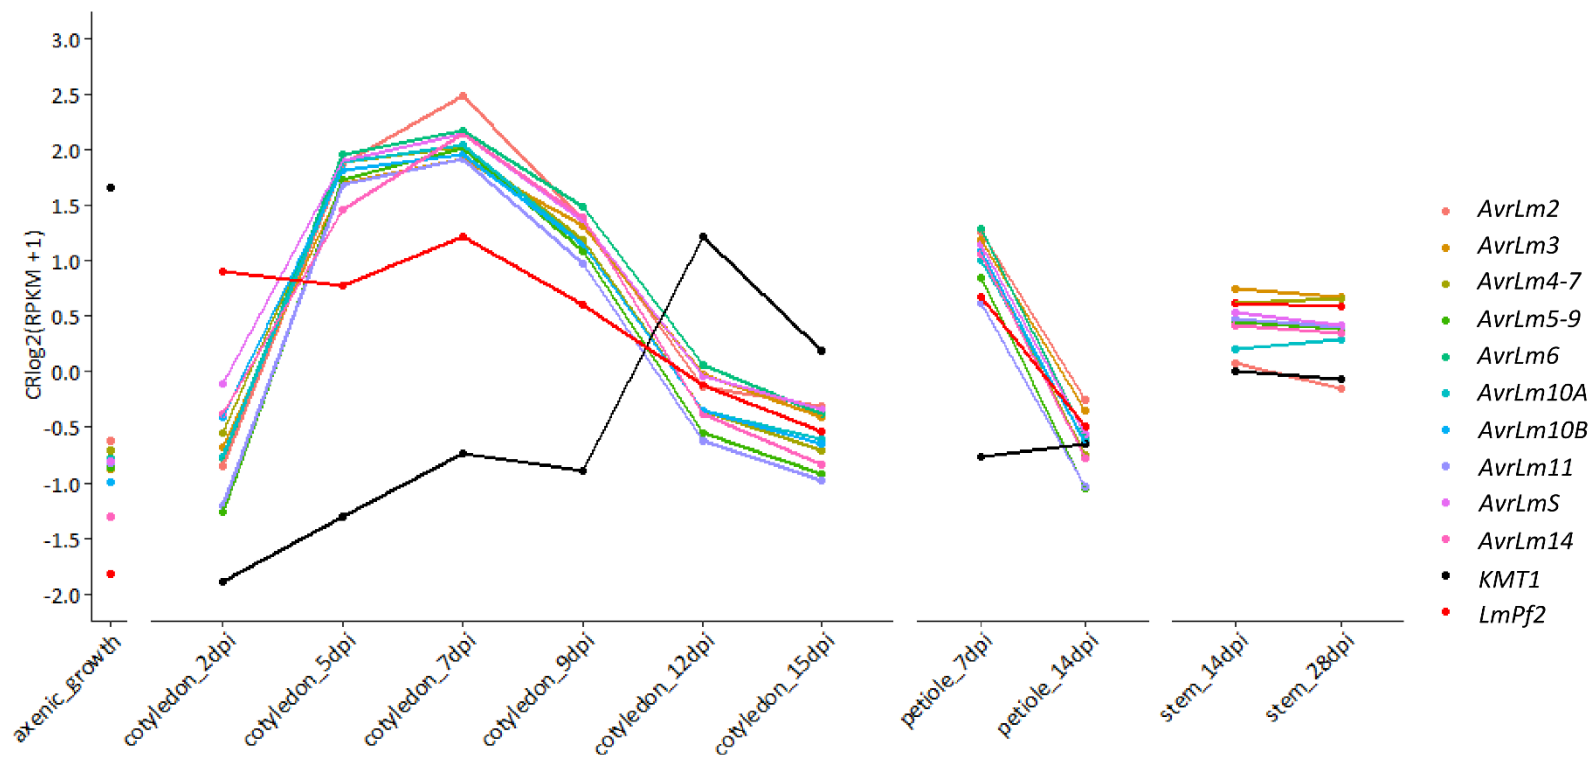

**Figure 2: Expression profile of *Leptosphaeria maculans* avirulence genes, the *LmPf2* transcription factor and *KMT1* during axenic growth, infection of oilseed rape cotyledons, petioles and stem.** Mycelium was obtained by growing the WT strain on V8-agar medium for 7 days (axenic growth). Oilseed rape was inoculated by the WT strain and sampled at different time points and on different organs (cotyledons at 2, 5, 7, 9, 12 and 15 days post infection, petiole at 7 and 14 dpi and stem at 14 and 28 dpi). The expression level of 10 avirulence genes, *LmPf2* and *KMT1* is represented by the log2 of RPKM (Reads Per Kilobase Per Million mapped reads) centered and reduced (Gay *et al.*, 2021).

281 **Inactivation of *Lmpf2* and *KMT1* do not induce morphological, conidiation or pigmentation defects**  
282 **while *LmPf2* over-expression induces developmental defects**

283 Inactivation of *Lmpf2* was performed using the CRISPR-Cas9 strategy and 16 transformants  
284 resistant to both hygromycin and geneticin were obtained and sequenced for the *LmPf2* gene. Among  
285 the 16 transformants, 12 had no mutations in *LmPf2* compared to the WT, three displayed a 1-bp  
286 deletion and one had a 5-bp deletion near the cleavage site (**Figure 3A**). These mutations resulted, at  
287 the protein level, in frame-shifts leading to two different truncated proteins of 175 amino-acids and  
288 238 amino-acids respectively for the 1-bp and the 5-bp deletions compared to the 658 amino-acids  
289 length of the WT protein (**Figures 3B, C**). The two mutants were crossed with the WT strain  
290 constitutively expressing GFP (Materials and Methods) in order to select in the progeny  $\Delta LmPf2$  and  
291  $\Delta LmPf2$ -GFP mutants without *Cas9* and CRISPR gRNA (**Table S2**). The four corresponding progeny  
292 strains are hereinafter referred to as  $\Delta LmPf2\_A$ ,  $\Delta LmPf2\_A$ -GFP,  $\Delta LmPf2\_B$  and  $\Delta LmPf2\_B$ -GFP (\_A  
293 corresponding to the 1-bp and \_B to the 5-bp deletion). The four  $\Delta LmPf2$  mutants were able to produce  
294 conidia (**Table 1** and data not shown) and their hyphae showed the same dark coloration similar to the  
295 WT after 14 days of growth on V8-juice agar medium (**Figure S1** and data not shown). After nine days  
296 of growth on V8-agar plate, only  $\Delta LmPf2\_B$  showed a significantly higher growth rate than the WT  
297 (Kruskal Wallis, *P value* <0.05; **Table1**) indicating that *Lmpf2* inactivation did not lead to growth defect.  
298 To summarize, no major defect in conidia production, growth rate or morphology was associated with  
299 the inactivation of *LmPf2*.

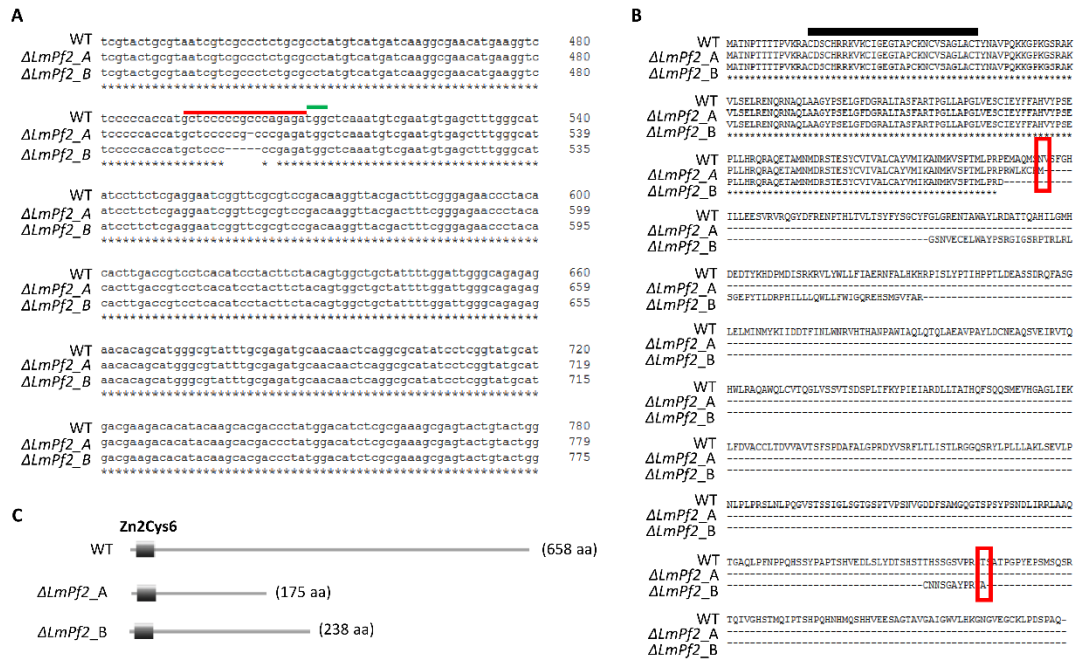

**Figure 3: Effect of the *LmPf2* mutations on LmPf2 protein sequence.** **A.** Alignment of the *LmPf2* gene of the WT isolate and two *LmPf2* mutants,  $\Delta LmPf2\_A$  and  $\Delta LmPf2\_B$ , showing respectively a 1-bp and 5-bp deletion. The PAM (Protospacer Adjacent Motif) is highlighted in green and the region targeted by the guide RNA is highlighted in red. **B.** Protein sequence of LmPf2 in the WT isolate and in the two  $\Delta LmPf2$  mutants. The DNA-Binding Domain is indicated by a black bar. The red frames indicate the location of the stop codons in the mutant versions of the protein. **C.** LmPf2 protein length and domains identified with Pfam as described (Finn *et al.*, 2014).

300

301 In a previous study, Soyer *et al.* (2014) silenced expression of *KMT1* (with a residual expression  
 302 of 16% compared to the WT strain). Silencing of *KMT1* led to an over-expression of effector genes  
 303 located in TE-rich regions, notably avirulence genes, during axenic growth. This over-expression was  
 304 associated, at least for two avirulence genes, with a decrease of H3K9me3 at their loci. Here, we took  
 305 advantage of the availability of the CRISPR-Cas9 strategy to better investigate involvement of *KMT1* in  
 306 the regulation of *L. maculans* gene expression. Twenty-five transformants resistant to hygromycin and  
 307 geneticin were obtained and sequenced for the *KMT1* gene. Among the 25 transformants, 24 had no  
 308 mutations in *KMT1* compared to the WT and one had a 1-bp insertion resulting, at the protein level, in  
 309 a truncated protein of 144 aa (while the WT protein had a length of 516 amino-acids; **Figure 4A and**  
 310 **B**). Both functional domains of *KMT1* (Pre-SET and SET) were absent from the truncated protein (Pfam  
 311 analysis; Finn *et al.*, 2014; <https://pfam.xfam.org/>; **Figure 4C**) resulting in loss of H3K9me3 in the  $\Delta kmt1$   
 312 mutant strain confirmed by Western blot analysis (**Figure 4D**; **Figure S2**). The  $\Delta kmt1$  mutant was  
 313 crossed with a WT-GFP strain in order to select in the progeny  $\Delta kmt1$  and  $\Delta kmt1$ -GFP mutants without  
 314 *Cas9* and CRISPR gRNA (**Table S2**). The two selected progeny isolates are hereinafter referred to as  
 315  $\Delta kmt1$  and  $\Delta kmt1$ -GFP mutants.  $\Delta kmt1$  was not significantly altered in its axenic growth, morphology  
 316 or conidia production (**Table 1**; **Figure S1** and data not shown).

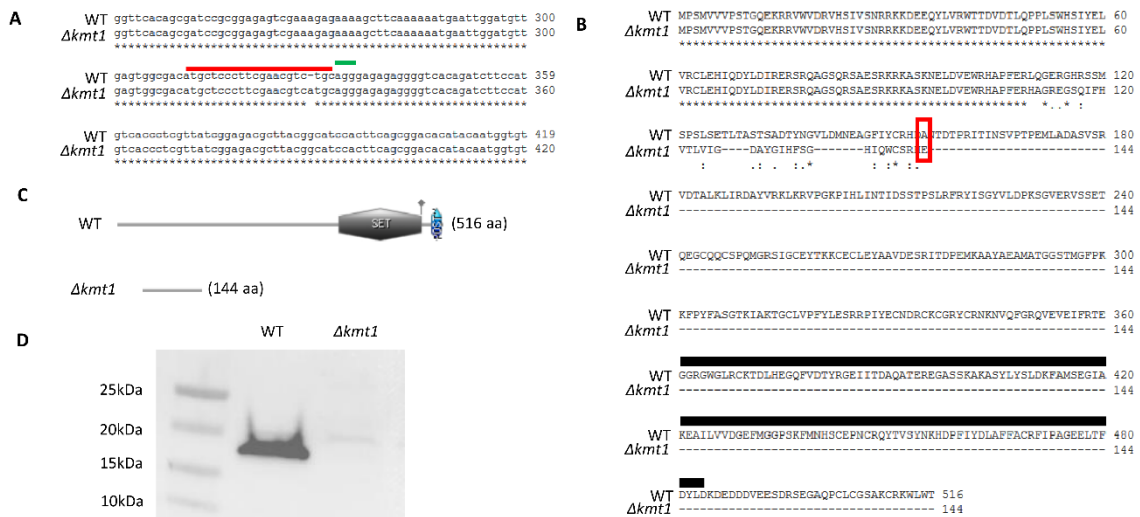

**Figure 4: Effect of the *kmt1* mutation on the KMT1 protein sequence and function. A.** Sequence alignment of the *KMT1* gene in the WT isolate and in the  $\Delta kmt1$  mutant showing a 1-bp insertion. The PAM (Protospacer Adjacent Motif) is highlighted in green and the region targeted by the guide RNA is highlighted in red. **B.** Protein sequence of KMT1 in the WT isolate and in the  $\Delta kmt1$  mutant. The red frame indicates the stop in the mutant version of the protein. The black bar indicates the SET domain which has been lost in the truncated protein. **C.** KMT1 protein length and domains identified with Pfam (Finn *et al.*, 2014). **D.** Western Blot analysis of H3K9 trimethylation in the WT isolate and in the  $\Delta kmt1$  mutant using an anti-H3K9me3 antibody (39062 Active Motif; see also Figure S2).

317

318 As association of effector genes enriched in H3K9me3-domains (deposited by KMT1) during  
319 axenic culture inhibits their expression, and that removal of H3K9me3 *in planta* might be a pre-  
320 requisite for concerted expression of effector genes (Soyer *et al.*, 2014; 2015a; 2021), we analyzed  
321 effect of *LmPf2* over-expression in two different genetic backgrounds: in the WT isolate and in the  
322  $\Delta kmt1$  mutant. Twenty-five transformants were recovered for each transformation and named  
323 respectively WT\_o*Pf2* and  $\Delta kmt1$ \_o*Pf2*. We measured expression of *LmPf2* during axenic growth by  
324 qRT-PCR in the transformants. Among the transformants, eight WT\_o*Pf2* transformants showed a 147  
325 to 18,000-fold increase of expression of *LmPf2* compared to the WT while *LmPf2* expression increased  
326 108 to 596-fold in seven  $\Delta kmt1$ \_o*Pf2* transformants (**Figure S3**). For further analyses, we selected two  
327 transformants from each genetic background with similar *LmPf2* expression levels (150 and 600 times  
328 more expressed than in the WT isolate or the  $\Delta kmt1$  transformant; **Figure S3**): WT\_o*Pf2*\_14,  
329 WT\_o*Pf2*\_24,  $\Delta kmt1$ \_o*Pf2*\_8 and  $\Delta kmt1$ \_o*Pf2*\_22 (hereafter referred to as WT\_o*Pf2*\_A, WT\_o*Pf2*\_B,  
330  $\Delta kmt1$ \_o*Pf2*\_A and  $\Delta kmt1$ \_o*Pf2*\_B). Over-expression of *LmPf2* did not induce any growth defect even  
331 though the thallus was denser and harbored a white coloration. Over-expression of *LmPf2* had a critical  
332 impact on conidiation excepted for the  $\Delta kmt1$ \_o*Pf2*\_A transformant which was able to produce  
333 conidia but to a lesser extent than the WT isolate (**Table 1; Figure S1**).

#### 334 **LmPf2 and KMT1 are involved in the pathogenicity of *L. maculans***

335 We inoculated the  $\Delta LmPf2$ ,  $\Delta LmPf2$ -GFP,  $\Delta kmt1$ ,  $\Delta kmt1$ -GFP, *LmPf2*-overexpressing  
336 transformants and the WT strain on cotyledons of a susceptible cultivar of oilseed rape.  $\Delta kmt1$  and

337 *Δkmt1-GFP* showed reduced symptoms compared to the WT, indicating a decrease of pathogenicity  
 338 (Figure 5A-C; Figure S4). Cotyledons infected with *Δkmt1-GFP* were observed from 5 to 13 dpi, which  
 339 allowed us to distinguish living plant cells, fungal hyphae, and production of pycnidia. The *Δkmt1-GFP*  
 340 transformant was able to colonize the plant and to produce pycnidia but induced less symptoms than  
 341 the WT (Figure 5; Figure S4). The *ΔLmPf2* mutants were not able to invade the cotyledon further than  
 342 the inoculation site, and consequently, did not induce any visible symptom (Figure 5; Figure S4; Table  
 343 1). Altogether, our results indicate that both KMT1 and LmPf2 are involved in infection establishment.

344

345 **Table 1: Influence of KMT1 and LmPf2 on axenic growth, conidia production, pathogenicity and**  
 346 **effector gene expression in *Leptosphaeria maculans***

| Isolate /<br>transformants <sup>a</sup> | Growth 9 days<br>post<br>inoculation on<br>V8 medium<br>(mm) <sup>b</sup> | conidia/ml           | Effector gene expression during axenic growth <sup>c</sup> |                                |
|-----------------------------------------|---------------------------------------------------------------------------|----------------------|------------------------------------------------------------|--------------------------------|
|                                         |                                                                           |                      | <i>AvrLm6</i>                                              | <i>AvrLm4-7</i>                |
| WT                                      | 60.5 (± 2.24)                                                             | 4.50.10 <sup>7</sup> | 1                                                          | 1                              |
| <i>Δkmt1</i>                            | 50.25 (± 1.94)                                                            | 4.00.10 <sup>7</sup> | 9.70.10 <sup>-2</sup> (± 0.22)                             | 2.37.10 <sup>2</sup> (± 27)    |
| <i>ΔLmPf2_A</i>                         | 56.13 (± 0.9)                                                             | 1.53.10 <sup>8</sup> | 4.60.10 <sup>-2</sup> (± 0)                                | 0                              |
| <i>ΔLmPf2_B</i>                         | 80 (± 0.8)*                                                               | 1.08.10 <sup>8</sup> | 6.30.10 <sup>-3</sup> (± 0)                                | 4.10.10 <sup>-3</sup> (± 0)    |
| WT_oPf2_A                               | 77.38 (± 0.76)                                                            | 0                    | 3.05 (± 0.14)                                              | 2.50.10 <sup>-1</sup> (± 0.20) |
| WT_oPf2_B                               | 73.5 (± 1.19)                                                             | 0                    | 2.68 (± 0.19)                                              | 7.00.10 <sup>-2</sup> (± 0.02) |
| <i>Δkmt1_oPf2_A</i>                     | 68.38 (± 1.03)                                                            | 2.00.10 <sup>7</sup> | 2.61.10 <sup>1</sup> (± 3.4)                               | 4.73.10 <sup>2</sup> (± 8.6)   |
| <i>Δkmt1_oPf2_B</i>                     | 53.75 (± 1.06)                                                            | 1.25.10 <sup>6</sup> | 1.30.10 <sup>4</sup> (± 107.79)                            | 2.31.10 <sup>3</sup> (± 24.64) |

347 <sup>a</sup>*ΔLmPf2\_A* and *\_B* are two *LmPf2* mutants; WT\_oPf2\_A and WT\_oPf2\_B correspond to *LmPf2* over-expressing  
 348 transformants in a WT background (with respectively a 600-fold and 150-fold over-expression of *LmPf2*  
 349 compared to the WT); *Δkmt1\_oPf2\_A* and *Δkmt1\_oPf2\_B* correspond to *LmPf2* over-expressing transformants in  
 350 a *Δkmt1* mutant background (with respectively a 150-fold and 600-fold expression of *LmPf2* compared to the  
 351 *Δkmt1* mutant);

352 <sup>b</sup>Growth was monitored by measuring the diameter of the colony on the Petri dish;

353 <sup>c</sup>Mycelium was obtained by growing the WT strain and transformants in Fries liquid medium for 7 days. Two  
 354 biological replicates per condition were generated. Total RNA was extracted. Expression of *AvrLm6* and *AvrLm4-*  
 355 *7* was measured by qRT-PCR and expressed relatively to *LmβTubulin* expression and to expression of *AvrLm6* or  
 356 *AvrLm4-7* in the WT using the 2<sup>-ΔΔCt</sup> method (Livak and Schmittgen, 2001);

357 \*: transformant statistically different from the WT, Kruskal Wallis test, *P-value* < 0.05.

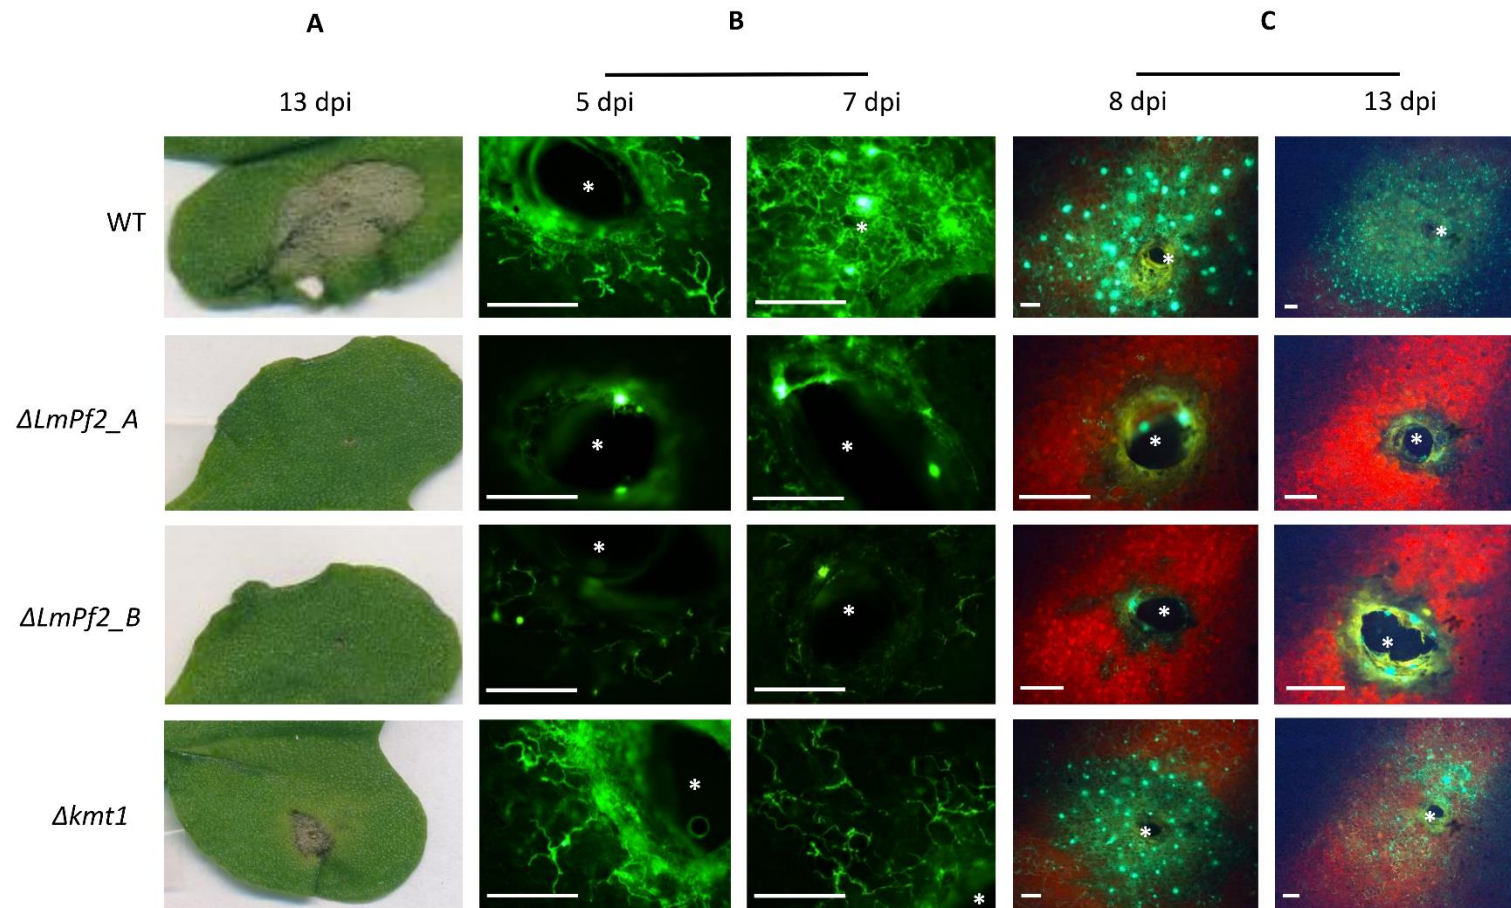

**Figure 5: Effect of *LmPf2* and *kmt1* mutations on pathogenicity of *Leptosphaeria maculans*.** The WT isolate and mutants inactivated for *LmPf2* or *KMT1* were inoculated on cotyledons of the susceptible cultivar of oilseed rape Es-Astrid. **A.** Pictures of symptoms at 13 dpi. **B.** Fluorescence images of cotyledons infected by GFP mutants and the WT isolate at 5 and 7 dpi using a confocal microscope. **C.** Fluorescence images of cotyledons infected by GFP mutants and the WT isolate at 8 and 13 dpi using a fluorescence binocular. Infection site (needle hole) is indicated by a white asterisk. Scale bars represent 1 mm. dpi = days post inoculation.



359 **LmPf2 and KMT1 are involved in the control of genes encoding known avirulence effectors**

360 We investigated expression of two avirulence genes (*AvrLm4-7* and *AvrLm6*) in the  $\Delta kmt1$ , the  
361  $\Delta LmPf2$  mutants and in the WT strain during axenic growth by qRT-PCR (**Table 1**). During axenic growth,  
362 these genes are lowly expressed (Rouxel *et al.*, 2011). In the  $\Delta kmt1$  mutant, *AvrLm6* was lowly  
363 expressed during axenic growth. On the contrary, *AvrLm4-7* was strongly over-expressed compared to  
364 the WT strain (237-fold more expressed; **Table 1**). *AvrLm4-7* and *AvrLm6* were lowly expressed in the  
365  $\Delta LmPf2$  mutants during the axenic culture, which is similar to expression of these genes in the WT  
366 strain (**Table 1**).

367 We also compared expression of *AvrLm4-7* and *AvrLm6* in the transformants over-expressing *LmPf2*  
368 (either in a WT or a  $\Delta kmt1$  background) and in the WT strain. Expression of *AvrLm6* slightly increased  
369 in the WT\_ *oPf2* mutants (with a maximum of 3-fold increase compared to the WT) while *AvrLm4-7* was  
370 less expressed in the WT\_ *oPf2* transformants than in the WT (**Table 1**). Over-expression of *LmPf2* in a  
371  $\Delta kmt1$  background induced a huge increase of expression of both *AvrLm4-7* and *AvrLm6* during axenic  
372 culture (**Table 1**; with a maximum of 2,300- and 13,000-fold increase respectively for *AvrLm4-7* and  
373 *AvrLm6*). Noticeably, the level of over-expression of the *AvrLm* genes correlated with the level of  
374 overexpression of *Lmpf2*. We then hypothesized that an even stronger over-expression of *LmPf2* would  
375 bypass the negative regulatory effect of KMT1, to investigate whether removal of H3K9me3 would not  
376 be a pre-requisite for effector gene induction *in planta*. Hence, we investigated expression of *AvrLm4-*  
377 *7* and *AvrLm6* in two WT\_ *oPf2* transformants (WT\_ *oPf2*\_22 and WT\_ *oPf2*\_25) in which *LmPf2* was  
378 over-expressed 10,000 and 18,000 times compared to the WT strain (**Figure S3, S5**). The strong *LmPf2*  
379 over-expression induced a higher up-regulation of *AvrLm4-7* and *AvrLm6* expression during axenic  
380 culture (with a maximum of 1,000-fold increase for *AvrLm4-7* and of 5,000-fold increase for *AvrLm6*).  
381 Nevertheless, it did not reach the same level as obtained when over-expressing *LmPf2* in a  $\Delta kmt1$   
382 background (**Table 1 and Figure S5**).

383 We then investigated expression of four avirulence genes (*AvrLm4-7*, *AvrLm6*, *AvrLm10A* and *AvrLm11*)  
384 in the  $\Delta LmPf2$ , the  $\Delta kmt1$  mutants and the WT strain during infection of oilseed rape at 7 dpi (when  
385 expression of *L. maculans* effectors reaches a peak in the WT strain). Inactivation of *LmPf2* strongly  
386 decreases expression of the four avirulence genes (1,000 to 2,000-fold less expressed in the  $\Delta LmPf2$   
387 mutant than in the WT) or even abolishes their expression (**Table 2**). Inactivation of *KMT1* also  
388 decreased, but to a lower extend, expression of the avirulence gene tested by qRT-PCR *in planta* (**Table**  
389 **2**). Altogether, our results confirm that KMT1 represses avirulence gene expression during axenic  
390 culture, suggest that *LmPf2* positively regulates their expression and that KMT1 and *LmPf2* act  
391 antagonistically to regulate expression of avirulence genes.

392

393 **Table 2: Influence of LmPf2 and KMT1 on avirulence gene expression during infection of oilseed rape**  
394 **cotyledons**

| Isolate/<br>transformant | expression <i>in planta</i> 7 dpi <sup>a</sup> |                       |                       |                       |
|--------------------------|------------------------------------------------|-----------------------|-----------------------|-----------------------|
|                          | <i>AvrLm4-7</i>                                | <i>AvrLm6</i>         | <i>AvrLm10A</i>       | <i>AvrLm11</i>        |
| WT                       | 3.25.10 <sup>1</sup>                           | 7.41.10 <sup>1</sup>  | 2.92.10 <sup>1</sup>  | 1.96.10 <sup>2</sup>  |
| $\Delta$ LmPf2_A         | nd                                             | 4.58.10 <sup>-2</sup> | 2.49.10 <sup>-2</sup> | 7.64.10 <sup>-2</sup> |
| $\Delta$ LmPf2_B         | 4.08.10 <sup>-3</sup>                          | 6.27.10 <sup>-3</sup> | 3.25.10 <sup>-2</sup> | 9.55.10 <sup>-2</sup> |
| $\Delta$ kmt1            | 1.03                                           | 4.23                  | 1.93                  | 5.23                  |

395 Expression of *AvrLm4-7*, *AvrLm6*, *AvrLm10A* and *AvrLm11* at 7 dpi of cotyledons of the susceptible cultivar Es-  
396 Astrid in the  $\Delta$ LmPf2 and  $\Delta$ kmt1 mutants and the WT isolate JN3.

397 <sup>a</sup>Gene expression levels are relative to  *$\beta$ -tubulin* and calculated as described by Muller *et al.* (2002). Each value  
398 is the average of two biological replicates (two extractions from different biological replicates) and two technical  
399 replicates (two RT-PCR). dpi: days post inoculation.

400 nd: not detected.

401

#### 402 **LmPf2 regulates sugar metabolism and CAZYme expression independently of the chromatin context**

403 To further investigate involvement of LmPf2 and KMT1 in the regulation of *L. maculans* genes,  
404 notably effector genes, we performed RNA-seq analyses during axenic growth of inactivated mutants,  
405 over-expressing transformants (with similar *LmPf2* transcript level) and the WT strain (i.e., WT,  $\Delta$ kmt1,  
406  $\Delta$ LmPf2\_A,  $\Delta$ LmPf2\_B, WT\_oPf2\_A, WT\_oPf2\_B,  $\Delta$ kmt1\_oPf2\_A and  $\Delta$ kmt1\_oPf2\_B; **Table S3**).  
407 Eighteen million reads were obtained, on average, for each sample. After pre-processing, between  
408 72% and 88% paired-end reads were uniquely mapped, except for one technical replicate of the  
409  $\Delta$ LmPf2\_A mutant for which only 39% of paired-end reads were mapped (**Table S3**). We then plotted  
410 the log<sub>2</sub>(RPKM+1) of each sample and observed that technical and biological replicates were  
411 consistent, except for the biological replicates of the  $\Delta$ kmt1\_oPf2 transformants (**Figure S6**). Based on  
412 that observation, data from biological replicates were merged for further analyses of gene expression,  
413 except for  $\Delta$ kmt1\_oPf2\_A and  $\Delta$ kmt1\_oPf2\_B that were considered separately for subsequent  
414 statistical analyses.

415 Among the different transformants, the transformant  $\Delta$ kmt1 showed the fewest DEG  
416 compared to the WT strain, while the transformant  $\Delta$ kmt1\_oPf2\_B had the highest number of DEG  
417 (272 and 1,792 genes respectively for  $\Delta$ kmt1 and  $\Delta$ kmt1\_oPf2\_B; **Table 3**). The higher number of DEG  
418 in the transformant  $\Delta$ kmt1\_oPf2\_B than in the  $\Delta$ kmt1\_oPf2\_A was consistent with the fact that level  
419 of expression of *LmPf2* was highest in the former (respectively 600 and 150-fold compared to the WT).  
420 In the genome of *L. maculans*, a GO annotation could be assigned to 5,076 genes of the 13,047  
421 predicted genes (Dutreux *et al.*, 2018). We set up an identification of the GO terms enriched between

422 the different transformants and the WT strain to gain insight into the underlying metabolic processes  
423 influenced by any of the transformant generated. No GO enrichment was identified among the DEG in  
424 the  $\Delta kmt1$  or  $\Delta LmPf2$  mutants compared to the WT. Genes up-regulated in the transformants over-  
425 expressing *LmPf2*, regardless of their genetic background, were enriched in GO categories involved in  
426 primary metabolism associated with carbohydrates uptake (e.g. starch, glucose, oligosaccharide  
427 metabolic process; **Tables S4, S5**). All seven GO categories enriched in the genes up-regulated due to  
428 over-expression of *LmPf2* in the  $\Delta kmt1\_oPf2\_A$  transformant were also identified when over-  
429 expressing *LmPf2* in the  $\Delta kmt1\_oPf2\_B$  transformant  $\Delta kmt1\_oPf2\_B$ ; **Table S5**). Thus, while *LmPf2* was  
430 considerably more over-expressed in  $\Delta kmt1\_oPf2\_B$  than in  $\Delta kmt1\_oPf2\_A$  and although they did not  
431 group together (**Figure S6**), over-expression of *LmPf2* influenced genes involved in similar processes.  
432 Seven GO categories were found enriched solely among genes up-regulated in  $\Delta kmt1\_oPf2\_B$  (**Table**  
433 **S5**). No GO enrichment was identified for genes down-regulated in the  $\Delta kmt1$  mutant and the  
434  $\Delta kmt1\_oPf2\_A$  transformant. One GO category (GO:0055114) was detected as enriched in the down-  
435 regulated genes of the  $\Delta LmPf2$  mutant, the WT\_*oPf2* and the  $\Delta kmt1\_oPf2\_B$  transformants,  
436 encompassing genes involved in oxido-reduction processes (**Table S6**). Overall, our GO enrichment  
437 analysis suggests that CAZymes (i.e. enzymes involved in biosynthesis, metabolism and carbohydrate  
438 transport) were significantly regulated in the transformants over-expressing *LmPf2* in a  $\Delta kmt1$   
439 background. In the genome of *L. maculans*, 330 genes are predicted as encoding CAZymes (Dutreux *et*  
440 *al.*, 2018) among which 109 genes were deregulated in at least one type of transformant generated in  
441 this study (**Table S7**). Altogether, our analysis confirmed that CAZymes were significantly regulated by  
442 *LmPf2* and *KMT1* (Chi<sup>2</sup> test; *P value* < 0.05).

443 **Table 3: Genes encoding effectors or located in particular chromatin domains differentially expressed after inactivation of *KMT1* or *Lmpf2* or over-**  
 444 **expression of *Lmpf2***

445

446

447

448

449

|     |                | Total genes         | Effector genes | H3K4me2<br>genes <sup>a</sup> | H3K9me3<br>genes <sup>a</sup> | H3K27me3<br>genes <sup>a</sup> | H3K9me3/H3K27me3<br>genes <sup>a</sup> |     |
|-----|----------------|---------------------|----------------|-------------------------------|-------------------------------|--------------------------------|----------------------------------------|-----|
| 450 |                | <i>Δkmt1</i>        | 129            | 22*                           | 22 <sup>#</sup>               | 3                              | 64*                                    | 4*  |
| 451 |                | <i>ΔLmpf2</i>       | 202            | 20                            | 68 <sup>#</sup>               | 4                              | 57*                                    | 5*  |
| 452 | Up-regulated   | <i>WT_oPf2</i>      | 247            | 46*                           | 46 <sup>#</sup>               | 2                              | 101*                                   | 6*  |
| 453 |                | <i>Δkmt1_oPf2_A</i> | 275            | 59*                           | 38 <sup>#</sup>               | 11*                            | 144*                                   | 15* |
| 454 |                | <i>Δkmt1_oPf2_B</i> | 931            | 154*                          | 233 <sup>#</sup>              | 25*                            | 329*                                   | 24* |
| 456 |                | <i>Δkmt1</i>        | 143            | 27*                           | 35 <sup>#</sup>               | 10*                            | 42*                                    | 9*  |
| 457 |                | <i>ΔLmpf2</i>       | 225            | 40*                           | 58 <sup>#</sup>               | 4                              | 88*                                    | 10* |
| 458 | Down-regulated | <i>WT_oPf2</i>      | 277            | 19                            | 110 <sup>#</sup>              | 1                              | 60*                                    | 3   |
| 459 |                | <i>Δkmt1_oPf2_A</i> | 158            | 23*                           | 32 <sup>#</sup>               | 11*                            | 47*                                    | 6*  |
| 460 |                | <i>Δkmt1_oPf2_B</i> | 861            | 83                            | 364 <sup>#</sup>              | 11                             | 182*                                   | 14* |

462

463 <sup>a</sup>Genes associated with H3K4me2 (di-methylation of lysine 4 of histone H3), H3K9me3 (tri-methylation of lysine 9 of histone H3), H3K27me3 (tri-methylation of lysine 27 of  
 464 histone H3) or H3K9me3 and H3K27me3 during axenic growth of the WT isolate (Soyer *et al.*, 2021);

465 <sup>#</sup>genes statistically under-represented in a given category;

466 <sup>\*</sup>genes statistically enriched in a given category;

467 Statistical analyses were performed using Chi<sup>2</sup>, *P value* < 0.05.

468 **KMT1 and LmPf2 control expression of effector genes associated to H3K9me3 and H3K27me3 during**  
469 **axenic culture**

470 In the genome of *L. maculans*, two types of heterochromatin domains have been identified,  
471 either associated with TE-rich genomic regions and H3K9me3 or associated with gene-rich regions in  
472 which H3K27me3-domains were detected. Both types of heterochromatin domains were enriched  
473 with effector genes (Soyer *et al.*, 2021) and with genes significantly up-regulated in *planta* (Gay *et al.*,  
474 2021). We confronted the transcriptomic analyses of the different transformants generated in our  
475 study with previously generated ChIP-seq data to identify a possible effect of KMT1 or LmPf2 on the  
476 expression of genes associated either with eu- or heterochromatin modifications. We observed a  
477 strong effect of KMT1 and or LmPf2 on expression of genes located in H3K9me3-domains *in vitro* due  
478 to the global loss of this modification in the  $\Delta kmt1$  mutant (Figure 3; **Figure S2**), but also an effect of  
479 KMT1 and LmPf2 on expression of genes located in H3K27me3-domains (**Table 3**). We also investigated  
480 whether inactivation of *KMT1*, *LmPf2*, or over-expression of *LmPf2* influenced expression of  
481 pathogenicity-related genes predicted in *L. maculans* (SSP-encoding genes and genes involved in  
482 secondary metabolite biosynthesis). Among the 11 previously cloned avirulence genes of *L. maculans*,  
483 eight were deregulated in at least one of the transformants (**Table 4**; one avirulence gene, *AvrLm1*,  
484 was not present in the strain used as genetic background). Inactivation of *KMT1*, *LmPf2* or over-  
485 expression of *LmPf2* in the WT strain had little effect on expression of these genes (**Table 4**). On the  
486 contrary, over-expression of *LmPf2* in a  $\Delta kmt1$  background led to up-regulation of eight *AvrLm* genes  
487 compared to the WT during axenic culture (**Table 4**). Inactivation of *KMT1* or over-expression of *LmPf2*  
488 in a WT background had no effect on expression of *AvrLm* genes while these genes were induced due  
489 to over-expression of *LmPf2* in a  $\Delta kmt1$  background. In conclusion, RNA-seq data support our  
490 hypothesis that removal of H3K9me3 is a pre-requisite for induction of avirulence gene expression via  
491 action of the TF LmPf2 but also showed that LmPf2 may have specific target among effector genes.

492 We then investigated whether we could observe the same effect on the 1,070 effector genes  
493 predicted in the genome of *L. maculans* (Gay *et al.*, 2021). Genes up- or down-regulated in the  $\Delta kmt1$   
494 mutant compared to the WT were enriched in effector genes (**Table 3**), confirming role of KMT1 in  
495 regulating expression of effector genes (Soyer *et al.*, 2014). Considering all transformants in which  
496 *LmPf2* is over-expressed (either in a WT background or in a  $\Delta kmt1$  background), 185 effector genes  
497 (i.e. 17% of effector genes) were up-regulated (**Table S8**), with the transformant  $\Delta kmt1\_opf2\_B$   
498 exhibiting the largest number of up-regulated effector genes and the WT\_*opf2* transformants having  
499 the lowest number of effector genes up-regulated (**Table 3**; **Table S8**). Finally, as *AvrLm* genes are all  
500 located within TE-rich environment of the *L. maculans* genome and associated with H3K9me3, except  
501 *AvrLm10B* associated with H3K9me3 and H3K27me3 (Rouxel *et al.*, 2011; Soyer *et al.*, 2021), we

502 wanted to know whether removal of H3K9me3 in the *Δkmt1* mutant combined with over-expression  
503 of *LmPf2* would preferentially increase expression of effector genes associated with H3K9me3. As for  
504 avirulence genes, while inactivation of *KMT1* or *LmPf2*, or over-expression of *LmPf2* in a WT  
505 background resulted in up-regulation of respectively three or two effector genes located in a  
506 H3K9me3-domain, the over-expression of *LmPf2* in a *Δkmt1* background resulted in up-regulation of  
507 20 out of the 36 effectors genes associated with H3K9me3 (**Table S9**). This analysis strengthens the  
508 hypothesis that KMT1 and the transcription factor LmPf2 work together, although through an opposite  
509 regulatory mechanism, to regulate the expression of effector genes localized in a H3K9me3 genomic  
510 context during axenic culture (including avirulence genes).

511 Finally, we investigated the influence of KMT1 and LmPf2 on expression of genes involved in  
512 secondary metabolism biosynthesis (PKS and NRPS). Among the 27 genes encoding NRPS or PKS  
513 (Dutreux *et al.*, 2018), a maximum of three of them were up-regulated in the different transformants  
514 (three in the *Δkmt1\_oPf2\_B* transformant; **Table S10**). In conclusion, NRPS or PKS-encoding genes did  
515 not appear to be regulated by KMT1 and / or LmPf2. Altogether, our analysis confirmed the key  
516 regulatory role of KMT1, highlighted the regulatory role of the transcription factor LmPf2 and  
517 suggested an antagonistic effect of both actors on the regulation of effector genes.

518 **Table 4: Influence of KMT1 and LmPf2 on expression of avirulence (*AvrLm*) genes, *KMT1* and *LmPf2* in *Leptosphaeria maculans* during axenic culture**

| ID            | name               | TE <sup>a</sup> | H3K4me2 <sup>b</sup> | H3K9me3 <sup>b</sup> | H3K27me3 <sup>b</sup> | $\Delta kmt1^c$ | $\Delta LmPf2^c$ | WT_oPf2 <sup>c</sup> | $\Delta kmt1\_oPf2\_A^c$ | $\Delta kmt1\_oPf2\_B^c$ |
|---------------|--------------------|-----------------|----------------------|----------------------|-----------------------|-----------------|------------------|----------------------|--------------------------|--------------------------|
| Lmb_jn3_00001 | <i>AvrLm3</i>      | yes             | -                    | all_included         | -                     | up              | -                | -                    | up                       | up                       |
| Lmb_jn3_03262 | <i>AvrLm4-7</i>    | yes             | -                    | all_included         | -                     | -               | -                | -                    | up                       | up                       |
| Lmb_jn3_05547 | <i>AvrLm14</i>     | yes             | -                    | all_included         | -                     | -               | -                | -                    | up                       | up                       |
| Lmb_jn3_06039 | <i>LmPf2</i>       | -               | overlap              | -                    | all_included          | -               | down             | up                   | up                       | up                       |
| Lmb_jn3_07862 | <i>AvrLm6</i>      | yes             | -                    | all_included         | -                     | -               | -                | -                    | up                       | up                       |
| Lmb_jn3_07863 | <i>AvrLm2</i>      | yes             | -                    | 5'_included          | -                     | down            | -                | -                    | -                        | up                       |
| Lmb_jn3_07874 | <i>AvrLm10_A</i>   | yes             | -                    | all_included         | -                     | down            | -                | -                    | down                     | up                       |
| Lmb_jn3_07875 | <i>AvrLm10_B</i>   | yes             | -                    | all_included         | all_included          | -               | down             | -                    | up                       | up                       |
| Lmb_jn3_08343 | <i>AvrLmS-Lep2</i> | yes             | -                    | all_included         | -                     | -               | -                | -                    | up                       | up                       |
| Lmb_jn3_09141 | <i>KMT1</i>        | -               | 3'_included          | -                    | overlap               | -               | -                | -                    | -                        | -                        |
| Lmb_jn3_10106 | <i>AvrLm5-9</i>    | yes             | -                    | all_included         | -                     | -               | -                | -                    | -                        | -                        |
| Lmb_jn3_12994 | <i>AvrLm11</i>     | yes             | -                    | all_included         | -                     | -               | -                | -                    | -                        | -                        |
| Lmb_jn3_13126 | <i>AvrLm1*</i>     | yes             | -                    | all_included         | -                     | N/A             | N/A              | N/A                  | N/A                      | N/A                      |

519 <sup>a</sup>Genes located in a TE-rich genomic context (Dutreux *et al.*, 2018);

520 <sup>b</sup>Genes associated with H3K4me2, H3K9me3 or H3K27me3 during axenic culture in the wild type strain (Soyer *et al.*, 2021);

521 <sup>c</sup>Genes deregulated in a given transformant compared to the WT strain during axenic culture (this analysis);

522 \**AvrLm1* is not present in the strain used for this RNA-seq analysis (i.e. strain JN2).

523 **LmPf2 and KMT1 influence expression of genes naturally over-expressed during infection of oilseed**  
524 **rape**

525 We took advantage of the availability of transcriptomic data throughout the lifecycle of *L. maculans*  
526 on oilseed rape to investigate whether genes naturally up-regulated *in planta* were influenced by  
527 LmPf2 and / or KMT1. 1,207 genes were previously found up-regulated in at least one stage of the  
528 infection of oilseed rape compared to the axenic culture of *L. maculans* (Gay *et al.*, 2021). Expression  
529 of genes up-regulated *in planta* were significantly regulated by LmPf2 or KMT1 as 31% were up-  
530 regulated in at least one of the transformants generated in this study (378 genes out of 1,207 genes;  
531 **Table S11**); (Chi<sup>2</sup> test,  $P < 2.2 \cdot 10^{-16}$ ). The largest number of up-regulated genes was observed in the  
532  $\Delta kmt1\_oPf2$  transformants, making these genes significantly regulated by KMT1 and / or LmPf2. The  
533 effect was even stronger for effector-encoding genes, since, among 256 effector-encoding genes over-  
534 expressed *in planta*, 115 (45%) were up-regulated in at least one of the transformants, with again the  
535 largest number of up-regulated genes in the  $\Delta kmt1\_oPf2\_B$  transformant (86 genes, 34%). Our analysis  
536 shows that KMT1 inhibits while LmPf2 positively regulates expression of genes naturally expressed *in*  
537 *planta*.

538



## 539 DISCUSSION

540 Focusing at the time on cotyledon infection, Soyer *et al.* (2015) proposed a two-layer  
541 regulatory model in which expression of *L. maculans* effector genes located in repeat-rich regions was  
542 repressed *in vitro* through H3K9me3 deposition by KMT1. They hypothesized that, *in planta*, an  
543 unknown signal triggered chromatin remodeling in the genomic environment of these effector genes  
544 allowing the binding of one or several transcription factor(s) leading to a concerted expression of  
545 effector genes (and possibly other pathogenicity-related genes located in TE-rich environment) during  
546 the primary infection of oilseed rape. Our results include other stages of plant colonization (petioles  
547 and stems), confirm that KMT1 represses effector gene expression during axenic culture, and show  
548 that LmPf2 positively regulates their expression and that both KMT1 and LmPf2 act together, in an  
549 opposite manner, to concertedly regulate expression of effector genes. Notably, *LmPf2* has an  
550 expression profile similar to that of the *L. maculans* avirulence genes and effector genes expressed  
551 during the asymptomatic phases of infection, while expression of *KMT1* is inversely correlated during  
552 axenic growth, cotyledon and petiole infection. To our knowledge, this is the first evidence of a double  
553 control involving a repressive histone modification and a specific TF on expression of effector genes in  
554 a fungal species. Altogether, these results allowed us to refine the proposed model for the double  
555 control of effector gene expression mediated by KMT1 and LmPf2 in *L. maculans*.

### 556 **LmPf2 is involved in the establishment of infection by *L. maculans***

557 In this study, we investigated the function of LmPf2 in *L. maculans*. CRISPR-Cas9 inactivation  
558 of *LmPf2* induced pathogenicity defects, with a very limited development of the fungus at the  
559 inoculation site, while the mutants had no alteration in their axenic growth or conidiation. In contrast,  
560 overexpression of *LmPf2* led to sporulation defects even if the transformants still induced symptoms  
561 on oilseed rape when inoculated through mycelial plugs. We conclude that, in *L. maculans*, LmPf2 is  
562 involved in the establishment of oilseed rape infection. In three other Pleosporales species, *i.e.* *A.*  
563 *brassicicola*, *P. tritici repentis* and *P. nodorum*, Pf2 was also essential for the establishment of infection  
564 (Cho *et al.*, 2013; Rybak *et al.*, 2017; Jones *et al.*, 2019). However, in *A. brassicicola*, AbPf2 was  
565 dispensable for normal growth while crucial for virulence on various Brassicaceae species (Cho *et al.*,  
566 2013). In *P. tritici-repentis*, *Pf2* mutants were both altered in their virulence on susceptible wheat  
567 cultivars and in their axenic growth and conidiation (Rybak *et al.*, 2017). In *Zymoseptoria tritici*, a Pf2  
568 orthologue was essential for virulence, but also regulates dimorphic switch, axenic growth and fungal  
569 cell wall composition (Habig *et al.*, 2020). So, while the involvement of Pf2 in pathogenicity is a  
570 common feature, its involvement in developmental processes or morphological switches is species-  
571 dependent (John *et al.*, 2021).

572 **LmPf2 controls carbon acquisition and cell-wall integrity independently of the chromatin context**

573 RNA-seq analyses in *A. brassicicola* and *P. nodorum* using *Pf2* knockout mutants suggested that Pf2  
574 controls the expression of a wide range of CWDEs during early infection (Cho *et al.*, 2013; Jones *et al.*,  
575 2019). PnPf2 positively regulates CAZymes, CWDEs, peptidases and hydrolases, while it negatively  
576 regulates general metabolic activity, possibly to conserve energy (Jones *et al.*, 2019). In *Z. tritici*, the  
577 Pf2 orthologue regulates carbon-sensing pathways (Habig *et al.*, 2020). In *L. maculans*, LmPf2 regulates  
578 sugar metabolism and CAZYme expression independently of the chromatin context. Conservation of  
579 Pf2 in many Pleosporales together with its involvement in regulation of CAZymes, CWDEs, peptidases  
580 and hydrolases suggest that a shared evolutionary origin exists in the regulation of carbon acquisition  
581 in Pleosporales. It also indicates that the function of Pf2 has been expanded in the course of evolution  
582 to the regulation of fungal effectors, in link with a chromatin-based control in *L. maculans* (see below).

583 **KMT1 is involved in fungal aggressiveness and in the control of effector gene expression in *L.***  
584 ***maculans***

585 We also investigated function of KMT1 in *L. maculans*.  $\Delta kmt1$  mutants displayed reduced  
586 aggressiveness on oilseed rape but normal growth and conidiation. This result contrasts with data  
587 obtained in *N. crassa*, *A. fumigatus* and *Z. tritici* in which the inactivation of *KMT1* led to growth defects  
588 (Tamaru and Selker, 2001; Palmer *et al.*, 2008; Möller *et al.*, 2019), but confirms involvement of KMT1  
589 in fungal pathogenicity found in *Z. tritici* (Möller *et al.*, 2019). Histone modification enzymes, notably  
590 KMT1, are increasingly documented for their ability to control concerted expression of secondary  
591 metabolite gene clusters and effector genes showing distinct genomic locations (Gacek and Strauss,  
592 2012; Soyer *et al.*, 2015; Collemare and Seidl, 2019). In the fungal endophyte *Epichloë festucea*, KMT1  
593 regulates synthesis of symbiosis-specific alkaloids, which act as bioprotective metabolites, and is  
594 crucial for establishment of mutualistic interaction (Chujo and Scott, 2014). In *L. maculans*, Soyer *et al.*  
595 (2014) found that partial silencing of *KMT1* through RNAi led to avirulence gene over-expression and  
596 H3K9me3 depletion (at least at two avirulence genes loci), and allowed up-regulation of 30% of the  
597 genes located in TE-rich regions during axenic culture. In this study, while inactivation of *KMT1* had a  
598 significant impact on effector gene expression, only one avirulence gene and three genes located in  
599 H3K9me3 domains were up-regulated *in vitro*. In contrast, inactivation of *KMT1* had a significant effect  
600 on genes located in H3K27me3 domains. We hypothesize that the complete inactivation of *KMT1* could  
601 have led to H3K27me3 relocation at native H3K9me3 domains, as previously reported for *N. crassa* or  
602 *Z. tritici* (Basenko *et al.*, 2015; Möller *et al.*, 2019). This phenomenon might be less pronounced when  
603 silencing *KMT1* as the gene was still expressed at almost 20%, suggesting that the KMT1 activity, hence  
604 H3K9me3 deposition, was not completely abolished in our transformants (Soyer *et al.*, 2014). The data

605 presented here, notably the wide effect on expression of genes encoding effectors due to over-  
606 expression of *LmPf2* in a  $\Delta kmt1$  background, nevertheless suggest that KMT1 is involved in the control  
607 of *L. maculans* effector gene expression and of genes located in heterochromatin regions.

### 608 **LmPf2 controls effector gene expression in a $\Delta kmt1$ mutant background**

609 In other Pleosporales, no investigation of a link between a histone-modifying enzyme and Pf2 was  
610 performed, and no over-expression of *Pf2* performed although it is demonstrated to be a positive  
611 regulator of effector genes. In this study, we highlighted a major role of LmPf2 in the control of effector  
612 gene expression in *L. maculans*. We determined that *LmPf2* inactivation led to effector gene expression  
613 defect *in planta*. Furthermore, *LmPf2* over-expression in a  $\Delta kmt1$  background significantly induces  
614 expression of i) up to 154 effector genes including eight avirulence genes, ii) 378 genes associated  
615 with heterochromatin, regardless of the nature of the encoded protein and iii) that up-regulation of  
616 avirulence genes was much higher when LmPf2 was over-expressed in a  $\Delta kmt1$  than in a WT  
617 background.. These results are consistent with previous studies that described Pf2 as a regulator of  
618 effector gene expression in three Pleosporales species (Cho *et al.*, 2013; Rybak *et al.*, 2017; Jones *et*  
619 *al.*, 2019). Pf2 was reported to regulate expression of 33 genes encoding putative secreted proteins  
620 including eight putative effectors in *A. brassicicola* (Cho *et al.*, 2013). In *P. nodorum*, PnPf2 was found  
621 to be an essential regulator of both *ToxA* and *Tox3* expression, but only moderately involved in *Tox1*  
622 regulation, while the orthologue of *SnToxA*, *ToxA*, was regulated by PtrPf2 in *P. tritici-repentis* (Rybak  
623 *et al.*, 2017). RNA-seq analyses in *P. nodorum* using *PnPf2* knockout mutants also suggested that PnPf2  
624 regulates a wide range of uncharacterized effector-like genes during early infection (Jones *et al.*, 2019).  
625 Altogether, these studies pointed out Pf2 as an important positive regulator of effector gene  
626 expression. However, these studies only reported effect of *Pf2* inactivation on gene expression and no  
627 over-expression of *Pf2* was performed. In *L. maculans*, we have investigated involvement of LmPf2 on  
628 regulation of gene expression not only through its inactivation but also via its over-expression in two  
629 different background. While the information on the chromatin context of effector genes is generally  
630 unavailable for the above-mentioned examples, in *L. maculans*, we highlighted a major effect of the  
631 chromatin-context on the ability of LmPf2 to regulate effector gene expression. Whether that model  
632 of double control of effector gene expression involving a specific TF and a histone-modifying protein  
633 could be generalized to other pathogenic fungi or if it is specific of *L. maculans* need to be investigated.  
634 For instance, in *Z. tritici*, inactivation of *KMT6* led to effector gene up-regulation that did not reach the  
635 expression level during wheat infection, suggesting the additional involvement of transcription  
636 factor(s) (Meile *et al.*, 2020). In contrast, in *F. oxysporum* f. sp. *lycopersici*, the transcription factors  
637 Sge1, FTF1 and FTF2 were able to regulate expression of effector genes located on a pathogenicity  
638 dispensable chromosome independently of chromatin-remodeling (van der Does *et al.*, 2016).

## 639 Conclusions

640 All of these data provide information to refine the model proposed by Soyer *et al.* (2015) and build an  
641 up-dated model. i) We firstly show that LmPf2 is a master regulator for expression of CAZymes, CWDEs,  
642 peptidases and hydrolases along with more than 500 genes associated with heterochromatin, and with  
643 a strong enrichment in effector genes, including most of the avirulence genes identified in *L. maculans*;  
644 ii) the regulation of *LmPf2* expression mirrors that of the genes included in the “biotrophy” wave, with  
645 rounds of up and down regulation; iii) the genes up-regulated during infection and associated with  
646 heterochromatin context, and notably, a H3K9me3 context, are less accessible to the TF as long as the  
647 chromatin is condensed. Accessibility during the asymptomatic stages of cotyledon infection is thus  
648 rendered possible by the reduced expression of *KMT1*; iv) at the end of the asymptomatic stage of  
649 colonization of cotyledons, set up of necrotrophy involves chromatin condensation due to *KMT1*  
650 expression, and reduced expression of *LmPf2*, resulting in extinction of expression of genes involved  
651 in the “biotrophy” wave; v) the process is repeated identically during asymptomatic colonization of  
652 petioles and stems. This indicates that, in *L. maculans*, most avirulence genes and a significant number  
653 of effector genes expressed during the asymptomatic stages of oilseed rape infection are under the  
654 double control of *KMT1* and *LmPf2*

655

## 656 REFERENCES

- 657 Altschul SF, Gish W, Miller W, Myers EW, Lipman DJ. 1990. Basic local alignment search tool. J  
658 Mol Biol. 215: 403–410.
- 659 Ansan-Melayah D, Balesdent M-H, Buée M, Rouxel T. 1995. Genetic characterization of  
660 AvrLm1, the first avirulence gene of *Leptosphaeria maculans*. Phytopathology. 85: 1525-1529.
- 661 Balesdent M-H, Attard A, Ansan-Melayah D, Delourme R, Renard M, Rouxel T. 2001. Genetic  
662 control and host range of avirulence toward *Brassica napus* cultivars Quinta and Jet Neuf in  
663 *Leptosphaeria maculans*. Phytopathology. 91: 70–76.
- 664 Balesdent, M-H, Attard A, Kühn ML, Rouxel T. 2002. New Avirulence genes in the  
665 phytopathogenic fungus *Leptosphaeria maculans*. Phytopathology. 92: 1122–1133.
- 666 Balesdent M-H, Fudal I, Ollivier B, Bally P, Grandaubert J, Eber F, Chèvre A-M, Leflon M, Rouxel,  
667 T. 2013. The dispensable chromosome of *Leptosphaeria maculans* shelters an effector gene conferring  
668 avirulence towards *Brassica rapa*. New Phytol. 198: 887–898.
- 669 Basenko, E.Y., Sasaki, T., Ji, L., Prybol, C.J., Burckhardt, R.M., Schmitz, R.J., Lewis, Z.A., 2015.  
670 Genome-wide redistribution of H3K27me3 is linked to genotoxic stress and defective growth.  
671 Proceedings of the National Academy of Sciences 112, E6339–E6348.

- 672 Bolger AM, Lohse M, Usadel B. 2014. Trimmomatic: a flexible trimmer for Illumina sequence  
673 data. *Bioinformatics*. 30: 2114–2120.
- 674 Cho Y, Ohm RA, Grigoriev IV, Srivastava A. 2013. Fungal-specific transcription factor AbPf2  
675 activates pathogenicity in *Alternaria brassicicola*. *Plant J*. 75: 498–514.
- 676 Chujo T, Scott B. 2014. Histone H3K9 and H3K27 methylation regulates fungal alkaloid  
677 biosynthesis in a fungal endophyte-plant symbiosis: K9 and K27 methylation regulates symbiosis. *Mol*  
678 *Microbiol*. 92: 413–434.
- 679 Collemare J, Seidl MF. 2019. Chromatin-dependent regulation of secondary metabolite  
680 biosynthesis in fungi: is the picture complete? *FEMS Microbiol Rev*. 43: 591-607.
- 681 Degrave A, Wagner M, George P, Coudard L, Pinochet X, Ermel M, Gay EJ, Fudal I, Moreno-Rico  
682 O, Rouxel T, Balesdent M-H. 2021. A new avirulence gene of *Leptosphaeria maculans*, *AvrLm14*,  
683 identifies a resistance source in American broccoli (*Brassica oleracea*) genotypes. *Mol Plant Pathol*.
- 684 Dobin A, Davis CA, Schlesinger F, Drenkow J, Zaleski C, Jha S, Batut P, Chaisson M, Gingeras TR.  
685 2013. STAR: ultrafast universal RNA-seq aligner. *Bioinformatics*. 29: 15–21.
- 686 Dutreux F, Da Silva C, d’Agata L, Couloux A, Gay EJ, Istace B, Lapalu N, Lemainque A, Linglin J,  
687 Noel B, Wincker P, Cruaud C, Rouxel T, Balesdent M-H, Aury JM. 2018. De novo assembly and  
688 annotation of three *Leptosphaeria* genomes using Oxford Nanopore MinION sequencing. *Sci Data*. 5:  
689 180235.
- 690 Finn RD, Bateman A, Clements J, Coghill P, Eberhardt RY, Eddy SR, Heger A, Hetherington K,  
691 Holm L, Mistry J, Sonnhammer ELL, Tate J, Punta M. 2014. Pfam: the protein families database. *Nucleic*  
692 *Acids Res*. 42: D222-230.
- 693 Fudal I, Ross S, Gout L, Blaise F, Kuhn ML, Eckert MR, Cattolico L, Bernard-Samain S, Balesdent  
694 M-H, Rouxel T. 2007. heterochromatin-like regions as ecological niches for avirulence genes in the  
695 *Leptosphaeria maculans* genome: map-based cloning of *AvrLm6*. *Mol Plant-Microbe Interact*. 20: 459–  
696 470.
- 697 Gacek A., Strauss, J., 2012. The chromatin code of fungal secondary metabolite gene clusters.  
698 *Appl Microbiol Biotechnol* 95, 1389–1404.
- 699 Gall C, Balesdent M-H, Desthieux I, Robin P, Rouxel T. 1995. Polymorphism of Tox0  
700 *Leptosphaeria maculans* isolates as revealed by soluble protein and isozyme electrophoresis.  
701 *Mycological Research*. 99: 221–229.
- 702 Gay EJ, Soyer JL, Lapalu N, Linglin J, Fudal I, Da Silva C, Wincker P, Aury JM, Cruaud C, Levrel A,  
703 Lemoine J, Delourme R, Rouxel T, Balesdent MH. 2021. Large-scale transcriptomics to dissect 2 years  
704 of the life of a fungal phytopathogen interacting with its host plant. *BMC Biol*. 19: 55.

- 705 Ghanbarnia K, Fudal I, Larkan NJ, Links MG, Balesdent M-H, Profotova B, Fernando WG, Rouxel  
706 T, Borhan MH. 2015. Rapid identification of the *Leptosphaeria maculans* avirulence gene *AvrLm2* using  
707 an intraspecific comparative genomics approach. *Mol Plant Pathol.* 16: 699-709.
- 708 Ghanbarnia K, Ma L, Larkan NJ, Haddadi P, Fernando WGD, Borhan MH. 2018. *Leptosphaeria*  
709 *maculans* *AvrLm9*: a new player in the game of hide and seek with *AvrLm4-7*. *Mol Plant Pathol.* 19:  
710 1754–1764.
- 711 Gout L, Fudal I, Kuhn M-L, Blaise F, Eckert M, Cattolico L, Balesdent M-H, Rouxel T. 2006. Lost  
712 in the middle of nowhere: the *AvrLm1* avirulence gene of the Dothideomycete *Leptosphaeria*  
713 *maculans*. *Mol Microbiol.* 60: 67–80.
- 714 Guo S, Zhong S, Zhang A. 2013. Privacy-preserving Kruskal-Wallis test. *Comput Methods*  
715 *Programs Biomed.* 112: 135–145.
- 716 Habig, M., Bahena-Garrido, S.M., Barkmann, F., Haueisen, J., Stukenbrock, E.H., 2020. The  
717 transcription factor Zt107320 affects the dimorphic switch, growth and virulence of the fungal wheat  
718 pathogen *Zymoseptoria tritici*. *Molecular Plant Pathology* 21, 124–138.
- 719 Hacquard, S., Joly, D.L., Lin, Y.-C., Tisserant, E., Feau, N., Delaruelle, C., Legué, V., Kohler, A.,  
720 Tanguay, P., Petre, B., Frey, P., Van de Peer, Y., Rouzé, P., Martin, F., Hamelin, R.C., Duplessis, S., 2012.  
721 A comprehensive analysis of genes encoding small secreted proteins identifies candidate effectors in  
722 *Melampsora larici-populina* (poplar leaf rust). *Mol. Plant Microbe Interact.* 25, 279–293.
- 723 Haueisen J, Möller M, Eschenbrenner CJ, Grandaubert J, Seybold H, Adamiak H, Stukenbrock  
724 EH. 2019. Highly flexible infection programs in a specialized wheat pathogen. *Ecol Evol.* 9: 275–294.
- 725 Idnurm A, Urquhart AS, Vummadi DR, Chang S, Van de Wouw AP, López-Ruiz FJ. 2017.  
726 Spontaneous and CRISPR/Cas9-induced mutation of the osmosensor histidine kinase of the canola  
727 pathogen *Leptosphaeria maculans*. *Fungal Biol Biotechnol.* 4: 12.
- 728 John E, Singh KB, Oliver RP, Tan KC 2021. Transcription factor control of virulence in  
729 phytopathogenic fungi. *Mol Plant Pathol.* 22:858-881. doi: 10.1111/mpp.13056.
- 730 Jones DAB, John E, Rybak K, Phan HTT, Singh KB, Lin SY, Solomon PS, Oliver RP, Tan KC. 2019.  
731 A specific fungal transcription factor controls effector gene expression and orchestrates the  
732 establishment of the necrotrophic pathogen lifestyle on wheat. *Sci Rep.* 9:15884.
- 733 Li H, Handsaker B, Wysoker A, Fennell T, Ruan J, Homer N, Marth G, Abecasis G, Durbin R. 2009.  
734 The sequence alignment/map format and SAMtools. *Bioinformatics.* 25: 2078–2079.
- 735 Livak KJ, Schmittgen TD. 2001. Analysis of relative gene expression data using real-time  
736 quantitative PCR and the 2(-Delta Delta C(T)) Method. *Methods.* 25: 402-408.
- 737 Lo Presti L, Lanver D, Schweizer G, Tanaka S, Liang L, Tollot M, Zuccaro A, Reissmann S,  
738 Kahmann R. 2015. Fungal Effectors and Plant Susceptibility. *Annu Rev Plant Biol.* 66: 513–545.

- 739           McCarthy DJ, Chen Y, Smyth GK. 2012. Differential expression analysis of multifactor RNA-Seq  
740 experiments with respect to biological variation. *Nucleic Acids Res.* 40: 4288–4297.
- 741           Meile L, Peter J, Puccetti G, Alassimone J, McDonald BA, Sánchez-Vallet A. 2020. Chromatin  
742 dynamics contribute to the spatiotemporal expression pattern of virulence genes in a fungal plant  
743 pathogen. *mBio.* 11: e02343-20.
- 744           Möller, M., Schotanus, K., Soyer, J., Haueisen, J., Happ, K., Stralucke, M., Happel, P., Smith,  
745 K.M., Connolly, L.R., Freitag, M., Stukenbrock, E.H., 2019. Destabilization of chromosome structure by  
746 histone H3 lysine 27 methylation.
- 747           Muller PY, Janovjak H, Miserez AR, Dobbie Z. 2002. Processing of gene expression data  
748 generated by quantitative real-time RT-PCR. *Biotechniques.* 32: 1372–1374, 1376, 1378–1379.
- 749           Mullins ED, Chen X, Romaine P, Raina R, Geiser DM. Kang S. 2001. *Agrobacterium*-mediated  
750 transformation of *Fusarium oxysporum*: an efficient tool for insertional mutagenesis and gene transfer.  
751 *Phytopathology.* 91: 173–180.
- 752           Neik TX, Ghanbarnia K, Ollivier B, Scheben A, Severn-Ellis A, Larkan NJ, Haddadi P, Fernando  
753 WGD, Rouxel T, Batley J, Borhan HM, Balesdent M-H. 2020. Two independent approaches converge to  
754 the cloning of a new *Leptosphaeria maculans* avirulence effector gene, *AvrLmS-Lep2*. *bioRxiv*.
- 755           Palmer, J.M., Perrin, R.M., Dagenais, T.R.T., Keller, N.P., 2008. H3K9 Methylation Regulates  
756 Growth and Development in *Aspergillus fumigatus*. *Eukaryot Cell* 7, 2052–2060. Papadopoulos JS,  
757 Agarwala R. 2007. COBALT: constraint-based alignment tool for multiple protein sequences.  
758 *Bioinformatics.* 23: 1073–1079.
- 759           Parlange F, Daverdin G, Fudal I, Kuhn M-L, Balesdent M-H, Blaise F, Grezes-Besset B, Rouxel T.  
760 2009. *Leptosphaeria maculans* avirulence gene *AvrLm4-7* confers a dual recognition specificity by the  
761 *Rlm4* and *Rlm7* resistance genes of oilseed rape, and circumvents *Rlm4*-mediated recognition through  
762 a single amino acid change. *Mol Microbiol.* 71: 851–863.
- 763           Petit-Houdenot Y, Degrave A, Meyer M, Blaise F, Ollivier B, Marais C-L, Jauneau A, Audran C,  
764 Rivas S, Veneault-Fourrey C, Brun H, Rouxel T, Fudal I, Balesdent M-H. 2019. A two genes - for - one  
765 gene interaction between *Leptosphaeria maculans* and *Brassica napus*. *New Phytol.* 223: 397–411.
- 766           Plissonneau C, Daverdin G, Ollivier B, Blaise F, Degrave A, Fudal I, Rouxel T, Balesdent M-H,  
767 2016. A game of hide and seek between avirulence genes *AvrLm4-7* and *AvrLm3* in *Leptosphaeria*  
768 *maculans*. *New Phytol.* 209: 1613-1624.
- 769           Robinson MD, McCarthy DJ, Smyth GK. 2010. edgeR: a Bioconductor package for differential  
770 expression analysis of digital gene expression data. *Bioinformatics.* 26: 139–140.
- 771           Rouxel T, Balesdent M-H. 2005. The stem canker (blackleg) fungus, *Leptosphaeria maculans*,  
772 enters the genomic era. *Mol Plant Pathol.* 6: 225–241.

- 773 Rouxel T, Grandaubert J, Hane JK, Hoede C, van de Wouw AP, Couloux A, Dominguez V,  
774 Anthouard V, Bally P, Bourras S, Cozijnsen AJ, Ciuffetti LM, Degrave A, Dilmaghani A, Duret L, Fudal I,  
775 Goodwin SB, Gout L, Glaser N, Linglin J, Kema GHJ, Lapalu N, Lawrence CB, May K, Meyer M, Ollivier B,  
776 Poulain J, Schoch CL, Simon A, Spatafora JW, Stachowiak A, Turgeon BG, Tyler BM, Vincent D,  
777 Weissenbach J, Amselem J, Quesneville H, Oliver RP, Wincker P, Balesdent M-H, Howlett BJ. 2011.  
778 Effector diversification within compartments of the *Leptosphaeria maculans* genome affected by  
779 Repeat-Induced Point mutations. *Nature Communications* 2:202.
- 780 Rybak K, See PT, Phan HT, Syme RA, Moffat CS, Oliver RP, Tan K-C. 2017. A functionally  
781 conserved Zn<sub>2</sub>Cys<sub>6</sub> binuclear cluster transcription factor class regulates necrotrophic effector gene  
782 expression and host-specific virulence of two major Pleosporales fungal pathogens of wheat. *Mol plant*  
783 *pathol.*18: 420–434.
- 784 Sánchez-Vallet A, Fouché S, Fudal I, Hartmann FE, Soyer JL, Tellier A, Croll D. 2018. The genome  
785 biology of effector gene evolution in filamentous plant pathogens. *Annu Rev Phytopathol.* 56: 21–40.
- 786 Šašek V, Nováková M, Dobrev PI, Valentová O, Burketová L. 2012.  $\beta$ -aminobutyric acid protects  
787 *Brassica napus* plants from infection by *Leptosphaeria maculans*. Resistance induction or a direct  
788 antifungal effect? *Eur. J. Plant Pathol.* 133: 279–289.
- 789 Shannon P, Markiel A, Ozier O, Baliga NS, Wang JT, Ramage D, Amin N, Schwikowski B, Ideker  
790 T. 2003. Cytoscape: a software environment for integrated models of biomolecular interaction  
791 networks. *Genome Res.* 13: 2498–2504.
- 792 Silayeva O, Barnes AC. 2018. Gibson assembly facilitates bacterial allelic exchange  
793 mutagenesis. *J. Microbiol. Methods.* 144: 157–163.
- 794 Soyer JL, El Ghalid M, Glaser N, Ollivier B, Linglin J, Grandaubert J, Balesdent M-H, Connolly LR,  
795 Freitag M, Rouxel T, Fudal I. 2014. Epigenetic control of effector gene expression in the plant  
796 pathogenic fungus *Leptosphaeria maculans*. *PLoS Genetics* 10: e1004227.
- 797 Soyer JL, Rouxel T, Fudal I. 2015. Chromatin-based control of effector gene expression in plant-  
798 associated fungi. *Curr Opin Plant Biol.* 26: 51–56.
- 799 Soyer JL, Grandaubert J, Haueisen J, Schotanus K, Stukenbrock EH. 2019. *In planta* chromatin  
800 immunoprecipitation in *Zymoseptoria tritici* reveals chromatin-based regulation of putative effector  
801 gene expression. *bioRxiv*.
- 802 Soyer JL, Clairet C, Gay EJ, Lapalu N, Rouxel T, Stukenbrock EH, Fudal I. 2021. Genome-wide  
803 mapping of histone modifications in two species of *Leptosphaeria maculans* showing contrasting  
804 genomic organization and host specialization. *Chromosome Res.* 29: 219-236.
- 805 Tamaru, H., Selker, E.U., 2001. A histone H3 methyltransferase controls DNA methylation in  
806 *Neurospora crassa*. *Nature* 414, 277–283.



807 Tan K-C, Oliver RP. 2017. Regulation of proteinaceous effector expression in phytopathogenic  
808 fungi. *PLoS pathog.* 13: e1006241.

809 van der Does, H.C., Fokkens, L., Yang, A., Schmidt, S.M., Langereis, L., Lukasiewicz, J.M.,  
810 Hughes, T.R., Rep, M., 2016. Transcription factors encoded on core and accessory chromosomes of  
811 *Fusarium oxysporum* induce expression of effector genes. *PLoS genetics* 12, e1006401.

812 Van de Wouw AP, Lowe RGT, Elliott CE, Dubois DJ, Howlett BJ. 2014. An avirulence gene,  
813 *AvrLmJ1*, from the blackleg fungus, *Leptosphaeria maculans*, confers avirulence to *Brassica juncea*  
814 cultivars. *Mol Plant Pathol.* 15: 523–530.

815 Weiberg A, Wang M, Lin FM, Zhao H, Zhang Z, Kaloshian I, Huang HD, Jin H. 2013. Fungal small  
816 RNAs suppress plant immunity by hijacking host RNA interference pathways. *Science.* 342: 118-123.

817 Zhang W, Huang J, Cook D. 2021. Histone modification dynamics at H3K27 are associated with  
818 altered transcription of *in planta*-induced genes in *Magnaporthe oryzae*. *PLOS Genet.* 17: e1009376.

819

## 820 **ACKNOWLEDGEMENT**

821 Authors wish to thank all members of the “Effectors and Pathogenesis of *L. maculans*” group,  
822 as well as Jonathan Grandaubert for fruitful discussion. We are grateful to the BIOGER  
823 bioinformatics platform (<https://bioinfo.bioger.inrae.fr/>; Nicolas Lapalu, Adeline Simon) for  
824 providing support and storage resources. We thank Alexander Idnurm (Melbourne University,  
825 Australia) for providing us with the vector and protocols for the CRISPR-Cas9 approach. C.  
826 Clairet and EJ. Gay were funded by a PhD salary from the University Paris-Saclay; A. Porquier  
827 was funded by the ANR-PRC Project CHOPIN (ANR-19-CE20-0022-01). This work was partly  
828 funded by the “Plant Health and Environment” division of INRAE (ChromaDyn Project). The  
829 “Effectors and Pathogenesis of *L. maculans*” group benefits from the support of Saclay Plant  
830 Sciences-SPS (ANR-17-EUR-0007).

## 831 **CONFLICT OF INTEREST**

832 The authors declare no conflict of interest.
